1 Zinc binding inhibits cellular uptake and antifungal activity of Histatin-5  
2 in *Candida albicans*

3 Joanna X. Campbell, Sean Gao, Keerthi S. Anand, and Katherine J. Franz\*

4 Department of Chemistry, Duke University, Durham, North Carolina 27708, United States of  
5 America

6 \*E-mail: [katherine.franz@duke.edu](mailto:katherine.franz@duke.edu)

7 Keywords: Histatin-5, *Candida albicans*, zinc, microscopy, antimicrobial peptide, antifungal.

8 **Abstract**

9 Histatin-5 (Hist-5) is a polycationic, histidine-rich antimicrobial peptide with potent  
10 antifungal activity against the opportunistic fungal pathogen *Candida albicans*. Hist-5 has the  
11 ability to bind metals in vitro and metals have been shown to alter the fungicidal activity of the  
12 peptide. Previous reports on the effect of  $Zn^{2+}$  on Hist-5 activity have been varied and seemingly  
13 contradictory. Here we present data elucidating the dynamic role  $Zn^{2+}$  plays as an inhibitory switch  
14 to regulate Hist-5 fungicidal activity. A novel fluorescently labeled Hist-5 peptide (Hist-5\*) was  
15 developed to visualize changes in internalization and localization of the peptide as a function of  
16 metal availability in the growth medium. Hist-5\* was verified for use as a model peptide and  
17 retained antifungal activity and mode of action similar to native Hist-5. Cellular growth assays  
18 showed that  $Zn^{2+}$  had a concentration-dependent inhibitory effect on Hist-5 antifungal activity.  
19 Imaging by confocal microscopy revealed that equimolar concentrations of  $Zn^{2+}$  kept the peptide  
20 localized along the cell periphery rather than internalizing, thus preventing cytotoxicity and

21 membrane disruption. However, the Zn-induced decrease in Hist-5 activity and uptake was rescued  
22 by decreasing Zn<sup>2+</sup> availability upon addition of a metal chelator EDTA or S100A12, a Zn-binding  
23 protein involved in the innate immune response. These results lead us to suggest a model wherein  
24 commensal *C. albicans* may exist in harmony with Hist-5 at concentrations of Zn<sup>2+</sup> that inhibit  
25 peptide internalization and antifungal activity. Activation of host immune processes that initiate  
26 Zn-sequestering mechanisms of nutritional immunity could trigger Hist-5 internalization and cell  
27 killing.

## 28 **Introduction**

29 Histatin-5 (Hist-5) is a histidine-rich peptide that is naturally produced in the salivary  
30 glands of higher primates as a part of the innate immune system.<sup>1</sup> Antimicrobial activity of Hist-5  
31 has been reported against a variety of bacterial and fungal species, including the opportunistic  
32 fungal pathogen, *Candida albicans* (*C. albicans*).<sup>1-5</sup> Fungal heat shock proteins Ssa1 and Ssa2  
33 have been identified as cell-surface receptors for Hist-5, with subsequent intracellular translocation  
34 utilizing polyamine transporters Dur3 and 31.<sup>6-10</sup> Once internalized, Hist-5 treatment ultimately  
35 leads to cell cycle arrest, volume dysregulation, formation of reactive oxygen species, and nonlytic  
36 efflux of ATP and other cytosolic small molecules and ions.<sup>11-16</sup> While much is known about the  
37 antifungal outcomes of Hist-5 on *C. albicans*, the mechanisms of Hist-5 activity are not fully  
38 established. Of particular interest to us is how metal ions potentiate the mode of action of Hist-5.

39 The amino acid sequence of Hist-5 (DSHAKRHHGYKRFHEKHSHRGY) possesses  
40 several metal-binding motifs capable of binding ions of multiple oxidation states of copper  
41 (Cu<sup>+2+</sup>), iron (Fe<sup>2+/3+</sup>), and zinc (Zn<sup>2+</sup>) with varying affinities.<sup>17-21</sup> We have shown previously that  
42 co-administration of Cu<sup>2+</sup> salts with Hist-5 improved its candidacidal activity, while addition of

43  $\text{Fe}^{3+}$  decreased its activity.<sup>19, 20</sup> Reports on the effects of  $\text{Zn}^{2+}$  on the activity of Hist-5, however,  
44 have been varied and seemingly contradictory.

45 Hist-5 has been reported to bind up to two equivalents of  $\text{Zn}^{2+}$ , one of which is putatively  
46 at the HEXXH site, a prominent zinc-binding motif found in larger metalloproteins.<sup>17, 18, 20-23</sup>  $\text{Zn}^{2+}$   
47 binding has been reported to induce conformational changes in Hist-5, favoring alpha-helical  
48 secondary structure and promoting dimerization and aggregation under some conditions.<sup>24-27</sup>  
49 While some studies suggest that  $\text{Zn}^{2+}$  has little to no effect on Hist-5 activity,<sup>20</sup> others claim  $\text{Zn}^{2+}$   
50 causes a decrease in the antifungal activity of the Hist-5 derivative, P113.<sup>28</sup> A recent study by  
51 Norris *et al.* reported an increase in Hist-5 antifungal activity at a 2:1 ratio of peptide to  $\text{Zn}^{2+}$ .<sup>25</sup>  
52 The authors subsequently followed up this study by showing that Hist-5+ $\text{Zn}^{2+}$  treatment not only  
53 promotes fungicidal activity but also has a role in maintaining commensalism of *C. albicans* in the  
54 oral cavity.<sup>29</sup> While these studies suggest a role for  $\text{Zn}^{2+}$  in modulating the effects of Hist-5 on *C.*  
55 *albicans*, the overall response remains unclear and contradictory.<sup>20, 25, 28</sup>

56 Concentrations of Hist-5 and  $\text{Zn}^{2+}$  in saliva are dynamic ranging from 0.7 – 30  $\mu\text{M}$  for  
57 Hist-5<sup>30, 31</sup> and 0.0001 – 155  $\mu\text{M}$  for  $\text{Zn}^{2+}$ .<sup>32-34</sup> These levels are subject to change based on a number  
58 of factors including age, diet, and health of the individual.<sup>31, 33, 35-38</sup> Probing how Hist-5 operates  
59 across a dynamic range of  $\text{Zn}^{2+}$  availability may be important for gaining a comprehensive  
60 understanding of its effect in modulating Hist-5 activity. In this study, we therefore set out to  
61 evaluate the activity and localization of Hist-5 against *C. albicans* in liquid culture across a range  
62 of physiologically relevant peptide and  $\text{Zn}^{2+}$  concentrations. Our results demonstrate that  
63 increasing  $\text{Zn}^{2+}$  supplementation negatively affects Hist-5 antifungal activity. By using a novel  
64 fluorescent Hist-5 analogue, Hist-5\*, we show that increasing the  $\text{Zn}^{2+}$  concentration promotes  
65 Hist-5 surface adhesion but inhibits peptide uptake into the cytosol. Furthermore, modulation of

66  $Zn^{2+}$  availability by extracellular metal-binding molecules reverses this  $Zn^{2+}$  inhibitory effect to  
67 recover Hist-5 cellular uptake and membrane disruption. These findings lead to a model in which  
68 the availability of  $Zn^{2+}$  may regulate the biological activity of Hist-5.

## 69 **Results**

### 70 **Design and characterization of a fluorescent Hist-5 analogue.**

71 Metal availability and metal binding have a profound impact on Hist-5 structure and  
72 activity.<sup>39, 40</sup> making retention of those properties crucial when developing modified Hist-5  
73 peptides for study. Previous studies have utilized fluorescein or rhodamine to label Hist-5 to study  
74 peptide uptake and intracellular targets.<sup>41, 42</sup> However, these labeling strategies conjugate the  
75 fluorophores at the N-terminus of the peptide, which would disrupt one of the recognized metal-  
76 binding sites of Hist-5, specifically the amino-terminal  $Cu^{2+}$ ,  $Ni^{2+}$  binding site. For our peptide  
77 design of Hist-5\*, we opted for lower molecular weight fluorophores incorporated along the Hist-  
78 5 sequence without disrupting metal-binding functionality. To minimize perturbations from bulky  
79 fluorophores, we chose to substitute the two tyrosine residues Y10 and Y24 with  
80 methoxycoumarin (Mca) and sulfamoylbenzofurazan (ABD) fluorophores, respectively (Figure  
81 1A). These fluorescent amino acids were incorporated into the peptide sequence during solid-phase  
82 peptide synthesis, either directly as an fmoc-protected amino acid in the case of Mca, or via  
83 reaction with a unique cysteine in the case of ABD (Figure S1). A doubly-labeled version of Hist-  
84 5 was chosen to enable potentially differential fluorescent response depending on metal type and  
85 binding site. Preliminary studies showed that tyrosine fluorescence specifically from Y10 was  
86 quenched by  $Cu^{2+}$ , so this position was chosen for Mca installation. The ABD fluorophore was  
87 installed at the C-terminus to serve as a potential ratiometric handle.

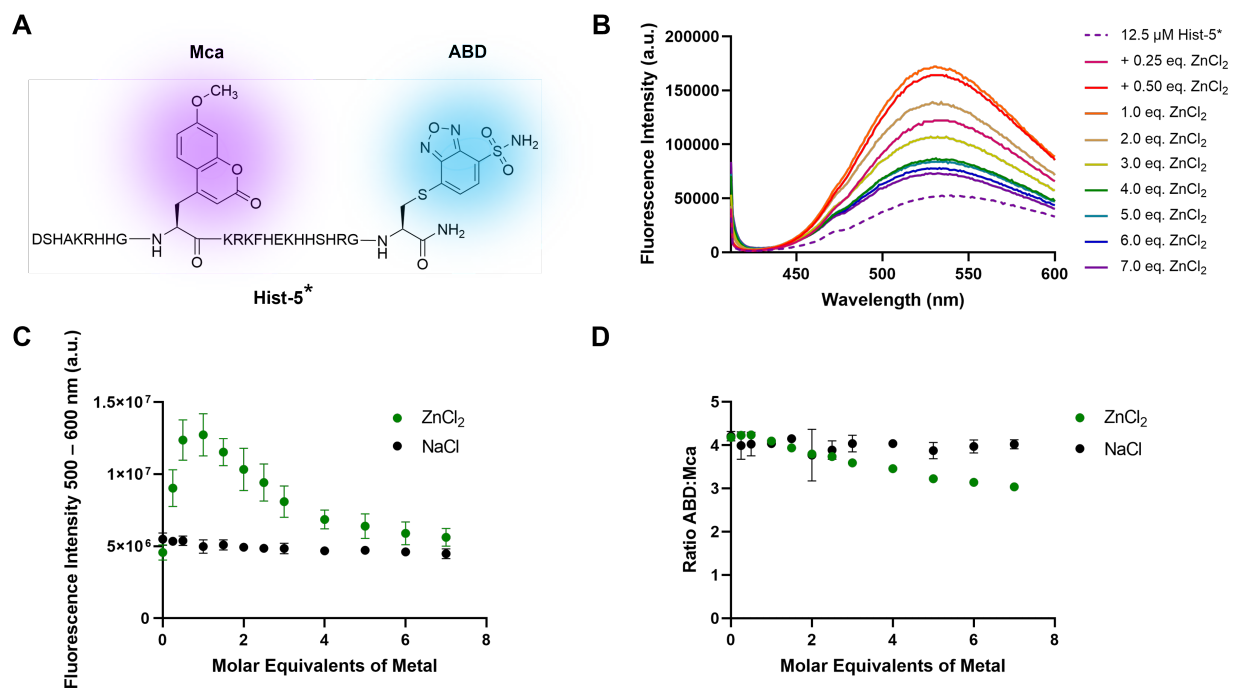

**Figure 1. Sequence and characterization of Hist-5\*.** (A) Sequence of Hist-5\* wherein Y10 and Y24 were replaced with methoxycoumarin (Mca,  $\lambda_{\text{ex}} = 325$  nm,  $\lambda_{\text{em}} = 400$  nm) and sulfamoylbenzofurazan (ABD  $\lambda_{\text{em}} = 385$  nm,  $\lambda_{\text{em}} = 510$  nm) fluorophores. (B) Emission spectrum of Hist-5\* excited at 405 nm upon titration of ZnCl<sub>2</sub> into 12.5 μM Hist-5\* in 1 mM potassium phosphate buffer (PPB) pH 7.4. (C) Fluorescence emission of the ABD fluorophore plotted as a function of added ZnCl<sub>2</sub> (green) or NaCl (black). (D) Ratio of the fluorescence intensities of ABD to Mca as a function of added ZnCl<sub>2</sub> (green) or NaCl (black).

88 To determine whether Hist-5\* could be used to detect metal-dependent changes in  
89 fluorescence we probed the fluorescence response of the two fluorophores to Zn<sup>2+</sup>. In these  
90 experiments, Zn<sup>2+</sup> was titrated into a solution of Hist-5\* in 1 mM potassium phosphate buffer (PPB)  
91 pH 7.4 and the fluorescence emission from each fluorophore was monitored over two wavelength  
92 ranges, 412 – 499 and 500 – 600 nm, for Mca and ABD respectively. We chose to excite Hist-5\*  
93 at 405 nm rather than at each fluorophore's maximal excitation wavelength to mimic the excitation  
94 and emission parameters to be used in subsequent microscopy studies. As shown in Figures 1B  
95 and C, the majority of the fluorescence response from Hist-5\* under these conditions can be  
96 attributed to the C-terminal ABD fluorophore. We observed an increase in Hist-5\* fluorescence  
97 that peaked at 1 molar equivalent of added Zn<sup>2+</sup>, with subsequent additions of Zn<sup>2+</sup> returning the

98 emission intensity back to the original Hist-5\* fluorescence. Titration with NaCl did not greatly  
99 affect Hist-5\* fluorescence (Figures 1C and D), indicating that the increase in Hist-5\* fluorescence  
100 was due to changes in  $Zn^{2+}$ , not chloride. By plotting the ratio of the fluorescence intensities,  
101 ABD:Mca, we were able to detect metal-dependent changes to Hist-5\* fluorescence (Figure 1D).

## 102 **Hist-5\* retains antifungal activity and uptake similar to native Hist-** 103 **5.**

104 The antifungal activity of Hist-5\* against *C. albicans* was evaluated via a microdilution  
105 96-well plate assay to determine the minimum inhibitory concentration (MIC) of the labeled  
106 peptide compared to unlabeled Hist-5. In these experiments, MIC is defined as the lowest  
107 concentration at which cell growth was no longer detected by optical density at 600 nm ( $OD_{600}$ ).  
108 We observed that cells treated with either Hist-5\* or Hist-5 had an MIC of 25  $\mu$ M (Figure 2A),  
109 indicating that the addition of the two fluorophores did not affect the antifungal activity of the  
110 peptide.

111 Confocal fluorescence microscopy was used to observe uptake of Hist-5\* into fungal cells  
 112 suspended in PPB at pH 7.4. Samples of *C. albicans*, in the yeast form, were treated with 12.5  $\mu\text{M}$   
 113 Hist-5\* and imaged over a thirty-minute period at room temperature (Figure 2B). Fluorescence  
 114 emission from the Mca and ABD fluorophores was collected in separate wavelength channels, 1  
 115 and 2 respectively. Fluorescence from the two channels was found to colocalize, thus in all  
 116 subsequent experiments the merged image of the two fluorescence channels is presented (Figure  
 117 S5). Internalization of the labeled peptide into the cytosol was observed within five minutes of

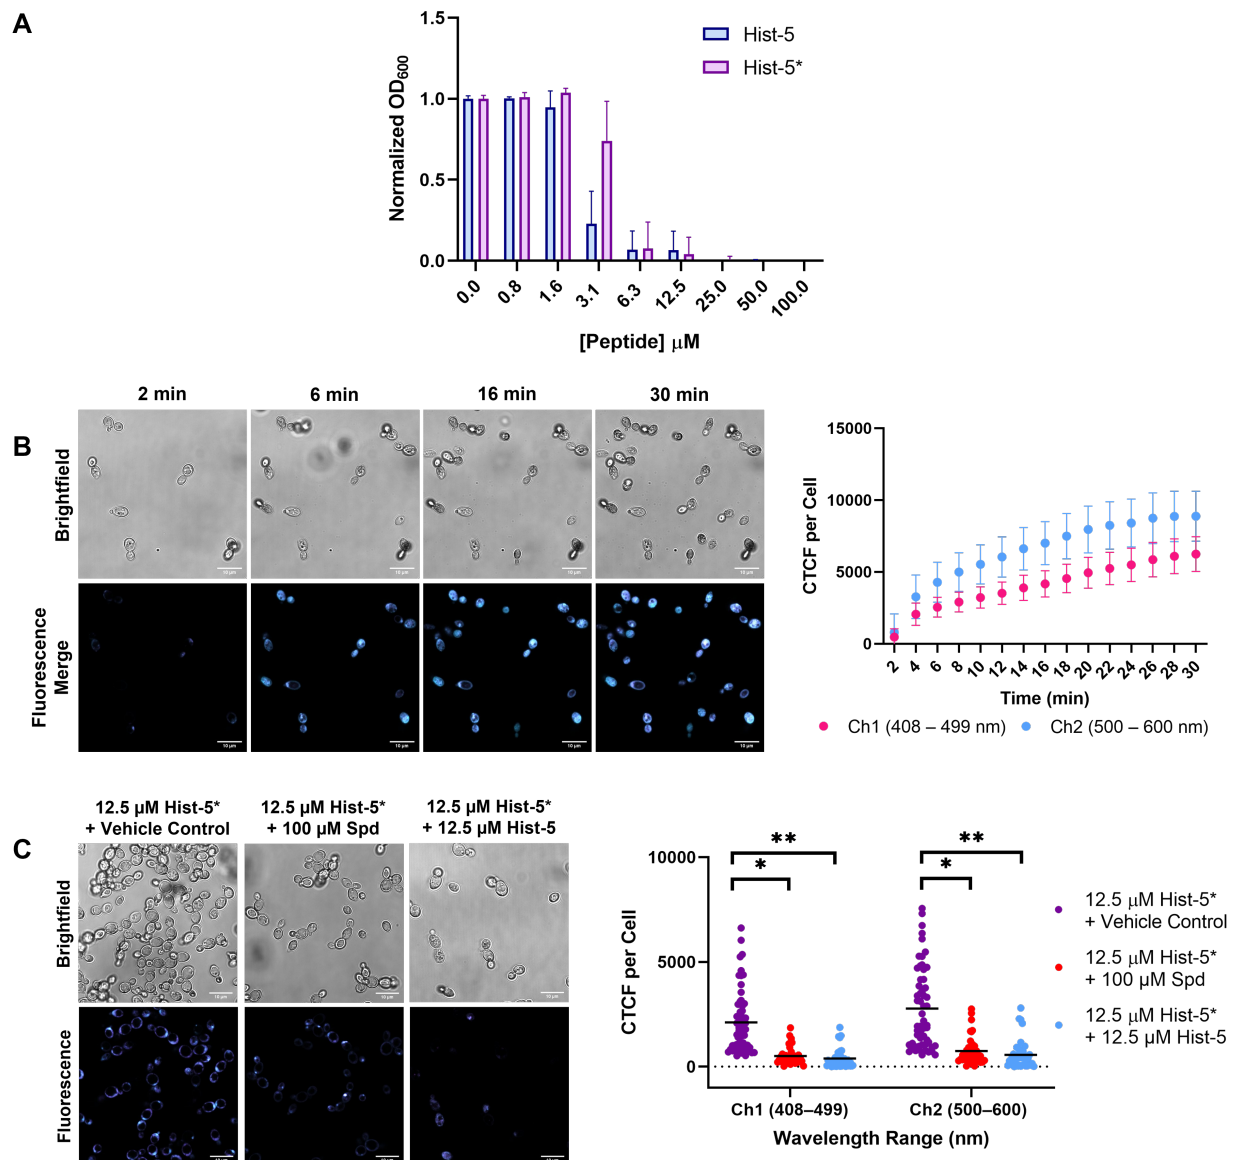

**Figure 2. Hist-5\* retains antifungal activity and uptake similar to native Hist-5.** (A) *C. albicans* cells were pre-incubated with increasing concentrations of Hist-5 (blue) or Hist-5\* (purple) for 1.5 h at 37 °C in PPB pH 7.4. Aliquots were resuspended in YPD and cell growth was measured by OD<sub>600</sub> after 48 h incubation at 30 °C. (B) Timelapse microscopy images of cells treated with 12.5 μM Hist-5\* at room temperature (RT) over 30 min in PPB. Corrected total cell fluorescence (CTCF) per cell is reported over time for each fluorophore channel. (C) Confocal fluorescence microscopy images of cells treated with Hist-5\* + vehicle control (purple), + spermidine (red), or + Hist-5 (blue) as competitive substrates for cellular uptake. Cells imaged at RT for 5 min in PPB. CTCF for individual fluorescence channels under each treatment condition were quantified, each dot representing fluorescence values from individual cells on experiments carried out on three separate days. Error bars represent the standard deviation between three biological replicates. Scale bar = 10 μm. (\* indicates  $p < 0.05$ , \*\* indicates  $p < 0.01$ ,  $n = 3$ )

118 treatment (Figure 2B), thus in subsequent experiments cells were imaged over a five-minute time  
119 frame. Untreated cells and cells treated with 50 μM unlabeled Hist-5 displayed no detectable  
120 fluorescence indicating the observed fluorescence signal from cells treated with Hist-5\* was not  
121 due to autofluorescence from the buffer, cells, or unlabeled peptide (Figure S6).

122 Hist-5 has been reported to use polyamine transporters Dur3/31 for intracellular  
123 translocation by *C. albicans* and cells grown in the presence of spermidine (Spd), the native  
124 substrate of these transporters, exhibit reduced uptake and killing activity of Hist-5.<sup>10</sup> We therefore  
125 performed competition assays with Hist-5\* and Spd to confirm that the labeled peptide still  
126 competes with Spd uptake by Dur3/31 (Figure 2C). Internalization of Hist-5\* was measured by  
127 quantifying the corrected total cell fluorescence (CTCF) per cell from fluorescence microscopy  
128 images. We observed a statistically significant ( $p = 0.0116$ ) decrease in Hist-5\* uptake in cells  
129 treated with a combination of labeled peptide and Spd, compared to cells treated with Hist-5\* and  
130 vehicle control. Unlabeled Hist-5 was also used as a competitive inhibitor for Hist-5\* uptake and  
131 resulted in a significant ( $p = 0.0093$ ) decrease in internalization of the labeled peptide (Figure 2C).  
132 These data demonstrate that our modified Hist-5\* peptide utilizes the same polyamine transport  
133 system that native Hist-5 uses for uptake into fungal cells. Altogether, these data validate Hist-5\*



134 as a novel fluorescent analogue that retains antifungal activity and uptake mechanisms similar to  
135 native Hist-5.

136 **Zn<sup>2+</sup> inhibits the antifungal activity of Hist-5 in a concentration-**  
137 **dependent manner.**

138 Two-dimensional broth microdilution checkerboard assays were performed to gain a more  
139 comprehensive understanding of the effect of Zn<sup>2+</sup> on Hist-5 activity across a range of peptide and  
140 Zn<sup>2+</sup> concentrations (Figure 3). In these experiments, cells suspended in PPB were first exposed  
141 to varying concentrations of Zn<sup>2+</sup> and Hist-5 prior to incubation in a Zn-free synthetic defined  
142 medium (SD-Zn). Experiments were conducted in SD-Zn to rigorously control the exposure of  
143 cells to extracellular Zn<sup>2+</sup>, ensuring that their only exposure would be upon combination treatment  
144 of Hist-5 and Zn<sup>2+</sup> in PPB. Under these rigorously-controlled conditions, Hist-5 alone exhibited  
145 potent antifungal activity against *C. albicans* cells, with an MIC of 0.8 μM in SD-Zn, indicating  
146 that Zn<sup>2+</sup> is not required for Hist-5 activity (Figure 3). We note that this 0.8 μM MIC of Hist-5  
147 against *C. albicans* cells in SD-Zn medium is significantly lower than that of the 25 μM MIC  
148 obtained in YPD medium, (Figures 2A and 3). This difference is likely because cells grown in a  
149 minimal media like SD-Zn are more sensitive than cells grown in a nutrient-rich broth like YPD.  
150 Interestingly, as cells were exposed to increasing concentrations of Zn<sup>2+</sup>, the MIC of Hist-5  
151 increased. The most striking inhibitory effect of Zn<sup>2+</sup> on Hist-5 occurred in cells exposed to the  
152 highest supplemental Zn<sup>2+</sup> concentration, where the MIC of Hist-5 increased roughly 16-fold, from  
153 0.8 μM to 12.5 μM (Figure 3). A similar Zn-induced inhibitory effect on antifungal activity was  
154 observed with our labeled Hist-5\* peptide (Figure S7).

155 The Zn-induced reduction of Hist-5 activity observed in our experiments seemingly  
156 contradict previous studies that found  $Zn^{2+}$  increases Hist-5 activity.<sup>25</sup> In order to reconcile these  
157 differences, we conducted checkerboard assays in which cells were exposed to low concentrations  
158 of  $Zn^{2+}$  and Hist-5 in a 1:2 ratio, mimicking the conditions described by Norris *et al.* in which they  
159 observed a Zn-induced increase in Hist-5 fungicidal activity.<sup>25</sup> Indeed, when cells were treated  
160 with sub-inhibitory concentrations of Hist-5,  $Zn^{2+}$  supplementation resulted in an increase in  
161 peptide activity, with the strongest effects observed at ratios of 1:2  $Zn^{2+}$  to peptide (Figure S8).

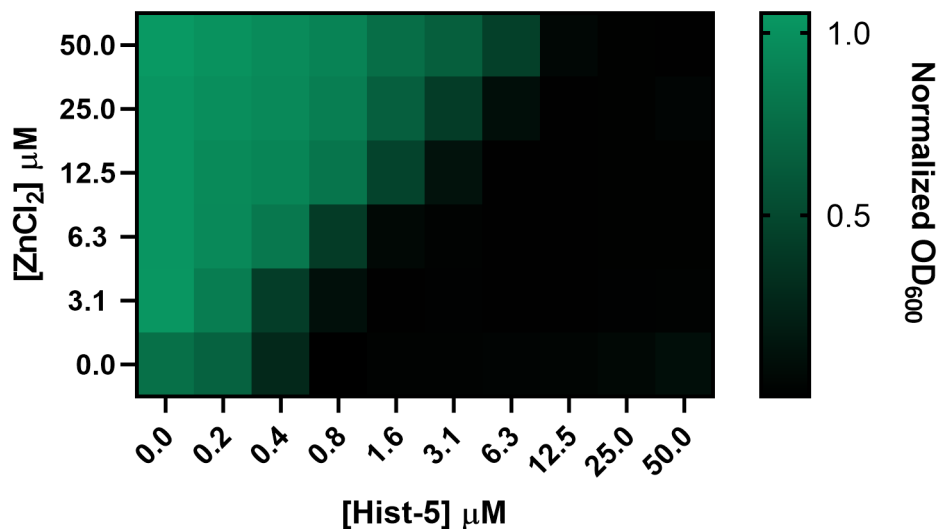

**Figure 3. Fungicidal activity of Hist-5 is inhibited by increasing concentration of  $Zn^{2+}$ .** *C. albicans* cells were pre-incubated in PPB pH 7.4 for 1.5 h at 37 °C with increasing concentrations of Hist-5 and  $ZnCl_2$  as indicated in the figure axes. Aliquots were resuspended in 50 mM Tris-buffered synthetic defined Zn-free media (SD-Zn), pH 7.4, and cell growth was measured by OD<sub>600</sub> after incubation for 48 h at 30 °C. Values represent the average from three separate biological replicates.

162 However, as the concentration of  $Zn^{2+}$  surpassed the concentration of Hist-5, the effects of  $Zn^{2+}$   
163 switched from promoting Hist-5 fungicidal activity to inhibiting it (Figure S8). These results  
164 highlight the dynamic nature by which  $Zn^{2+}$  can modulate the antifungal activity of Hist-5, and  
165 help to reconcile seemingly contradictory conclusions.

166 Previous reports of Zn-induced peptide dimerization and aggregation were conducted using  
167 concentrations of  $Zn^{2+}$  and Hist-5 above 300  $\mu M$ , significantly higher than the maximum peptide  
168 concentration of 50  $\mu M$  used in our experiments.<sup>24-27</sup> To determine whether Hist-5 dimers or  
169 aggregates were forming in our system, we used circular dichroism (CD) spectroscopy to monitor  
170 Hist-5 secondary structure in the presence of excess  $Zn^{2+}$  in both aqueous PPB and trifluoroethanol  
171 (TFE). Hist-5 exists in a random coil conformation in aqueous solution and adopts a more ordered,  
172 alpha-helical structure in membrane-like environments.<sup>2, 43</sup> We observed a decrease in ellipticity  
173 upon addition of excess  $Zn^{2+}$  in both aqueous and organic solvent (Figure 4A). For Hist-5 in a  
174 random coil conformation, the ellipticity at 198 nm was plotted against increasing concentrations  
175 of Hist-5 in the presence of excess  $Zn^{2+}$  and fit to a linear model,  $R^2 = 0.999$  (Figure 4B), with  
176 ellipticity expected to vary linearly with concentration in the absence of oligomerization.<sup>44</sup> For  
177 Hist-5 in an alpha-helical conformation, ellipticity at 222 nm was plotted against peptide  
178 concentration in the presence of excess  $Zn^{2+}$  and fit to a linear model,  $R^2 = 0.998$  (Figure 4C). We  
179 did not observe any deviations from linearity up to 50  $\mu M$  Hist-5 in either PPB or TFE, indicating  
180 that under our conditions Zn-induced peptide dimerization/aggregation is not occurring.

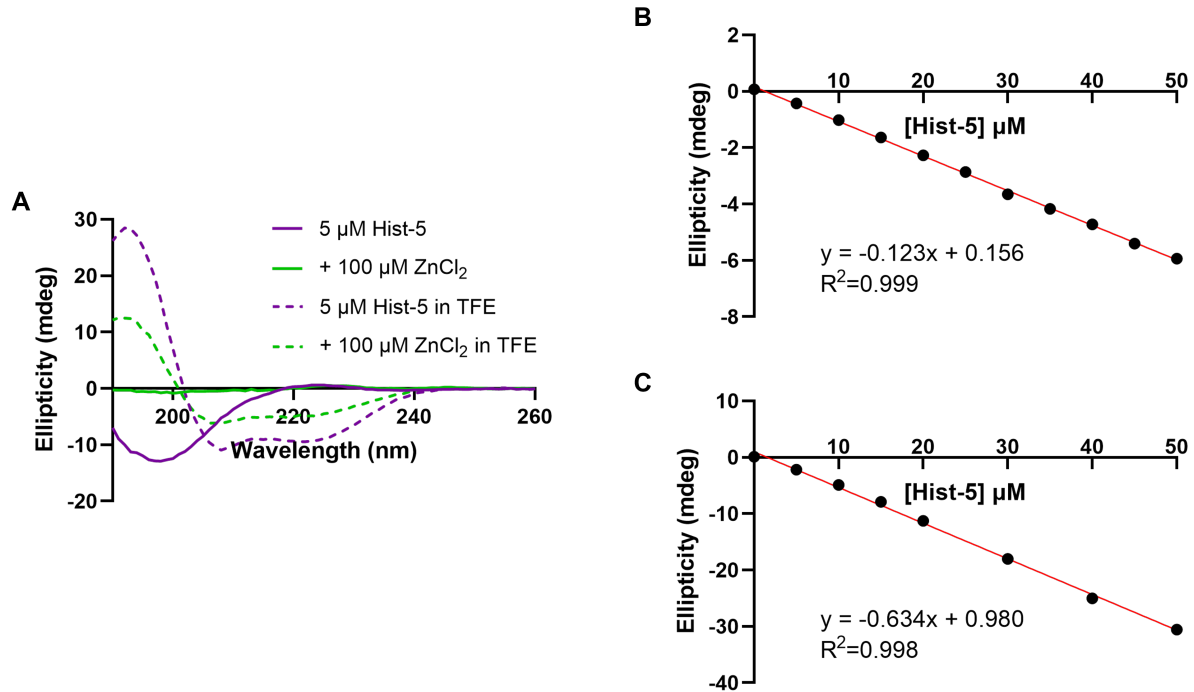

**Figure 4. Changes in Hist-5 ellipticity remain linear up to 50 μM added peptide.** (A) Full CD spectrum of 5 μM Hist-5 (purple) with or without 100 μM ZnCl<sub>2</sub> (green) in PPB (solid lines) or 98% trifluoroethanol, TFE (dashed lines). (B) Titration of 0 – 50 μM Hist-5 into a solution containing 250 μM ZnCl<sub>2</sub> in PPB. The ellipticity at 198 nm is plotted against peptide concentration and fit to linear model ( $R^2 = 0.999$ ). (C) Titration of 0 – 50 μM Hist-5 into a solution containing 250 μM ZnCl<sub>2</sub> in 98% TFE. The ellipticity at 222 nm is plotted against peptide concentration and fit to linear model ( $R^2 = 0.998$ ). Data represent the average of three scans.

181 **Supplemental Zn<sup>2+</sup> promotes surface adhesion of peptide to *C.***  
182 ***albicans* and inhibits internalization.**

183 Uptake of Hist-5 by *C. albicans* is widely accepted as a requirement for antifungal activity,  
184 as Hist-5 is thought to have intracellular targets.<sup>9, 25, 29, 41</sup> We observed a decrease in Hist-5 activity  
185 as a function of increasing Zn<sup>2+</sup> concentration, thus we performed timelapse microscopy with *C.*  
186 *albicans* exposed to Hist-5\* treated with a range of added Zn<sup>2+</sup> concentrations to determine  
187 whether the decrease in antifungal activity could be the result of decreased peptide internalization.  
188 Rapid uptake and cytosolic fluorescence of Hist-5\* in cells treated with peptide alone or peptide

189 and a sodium chloride control were observed (Figure 5A). As the molar ratio of  $Zn^{2+}$  to peptide  
190 was increased from 0:1 to 0.5:1, there was reduced uptake of Hist-5\* (Figure S9). The most striking  
191 results occurred in cells treated with 1:1 or 2:1 molar equivalents of  $Zn^{2+}$  to peptide. Under these  
192 conditions Hist-5\* no longer appeared to internalize into the fungal cell, but instead remained  
193 bound to the cell surface (Figure 5A). This surface-bound state is evidenced in the localization of  
194 Hist-5\* fluorescence around the perimeter of the cells, as shown in the intensity profiles (Figure  
195 5A). The change in peak shape and the shift to a bimodal distribution directly correspond to the  
196 shift in peptide fluorescence and localization from the cytosol to the cell surface, as a function of  
197  $Zn^{2+}$  concentration (Figure 5A). Adherence of Hist-5\* to the cell perimeter was observed for up to  
198 two hours with timelapse microscopy (Figure S10), indicating that this effect is not transient.  
199 Additionally, this effect is specific for  $Zn^{2+}$  and does not occur in cells treated with equivalent  
200 concentrations of Hist-5\* and other divalent metal cations,  $Cu^{2+}$  and  $Co^{2+}$  (Figure S11). The  
201 decrease in peptide internalization as a function of  $Zn^{2+}$  concentration was quantified and reported  
202 as CTCF (Figure 5B). A slight, but significant ( $p = 0.0245$ ), decrease in Hist-5\* internalization  
203 was seen in cells treated with 0.25 equivalents of  $Zn^{2+}$ , while cells treated with 0.5 equivalents of  
204  $Zn^{2+}$  or more experienced even greater decreases in peptide internalization ( $p < 0.001$ ).

205 To determine how  $Zn^{2+}$  supplementation affects Hist-5 membrane disruptive activity, we  
206 performed confocal fluorescence microscopy experiments with native Hist-5 peptide, using  
207 propidium iodide (PI) as a fluorescent indicator of membrane integrity (Figure 5C). Hist-5 induces  
208 membrane disruptions in *C. albicans* that allows leakage of PI into the cytosol. Treatment of cells  
209 with Hist-5 in combination with submolar equivalents of  $Zn^{2+}$  also resulted in internalization of  
210 PI, indicating membrane permeability. However, exposure of fungal cells to Hist-5 treated with  
211 one or more molar equivalents of  $Zn^{2+}$  did not cause dye leakage (Figure 5C), suggesting that these

212 concentrations of  $Zn^{2+}$  protect against Hist-5-induced membrane disruption. Combined, our results  
 213 show that  $Zn^{2+}$  supplementation alters Hist-5 uptake and activity by promoting peptide localization

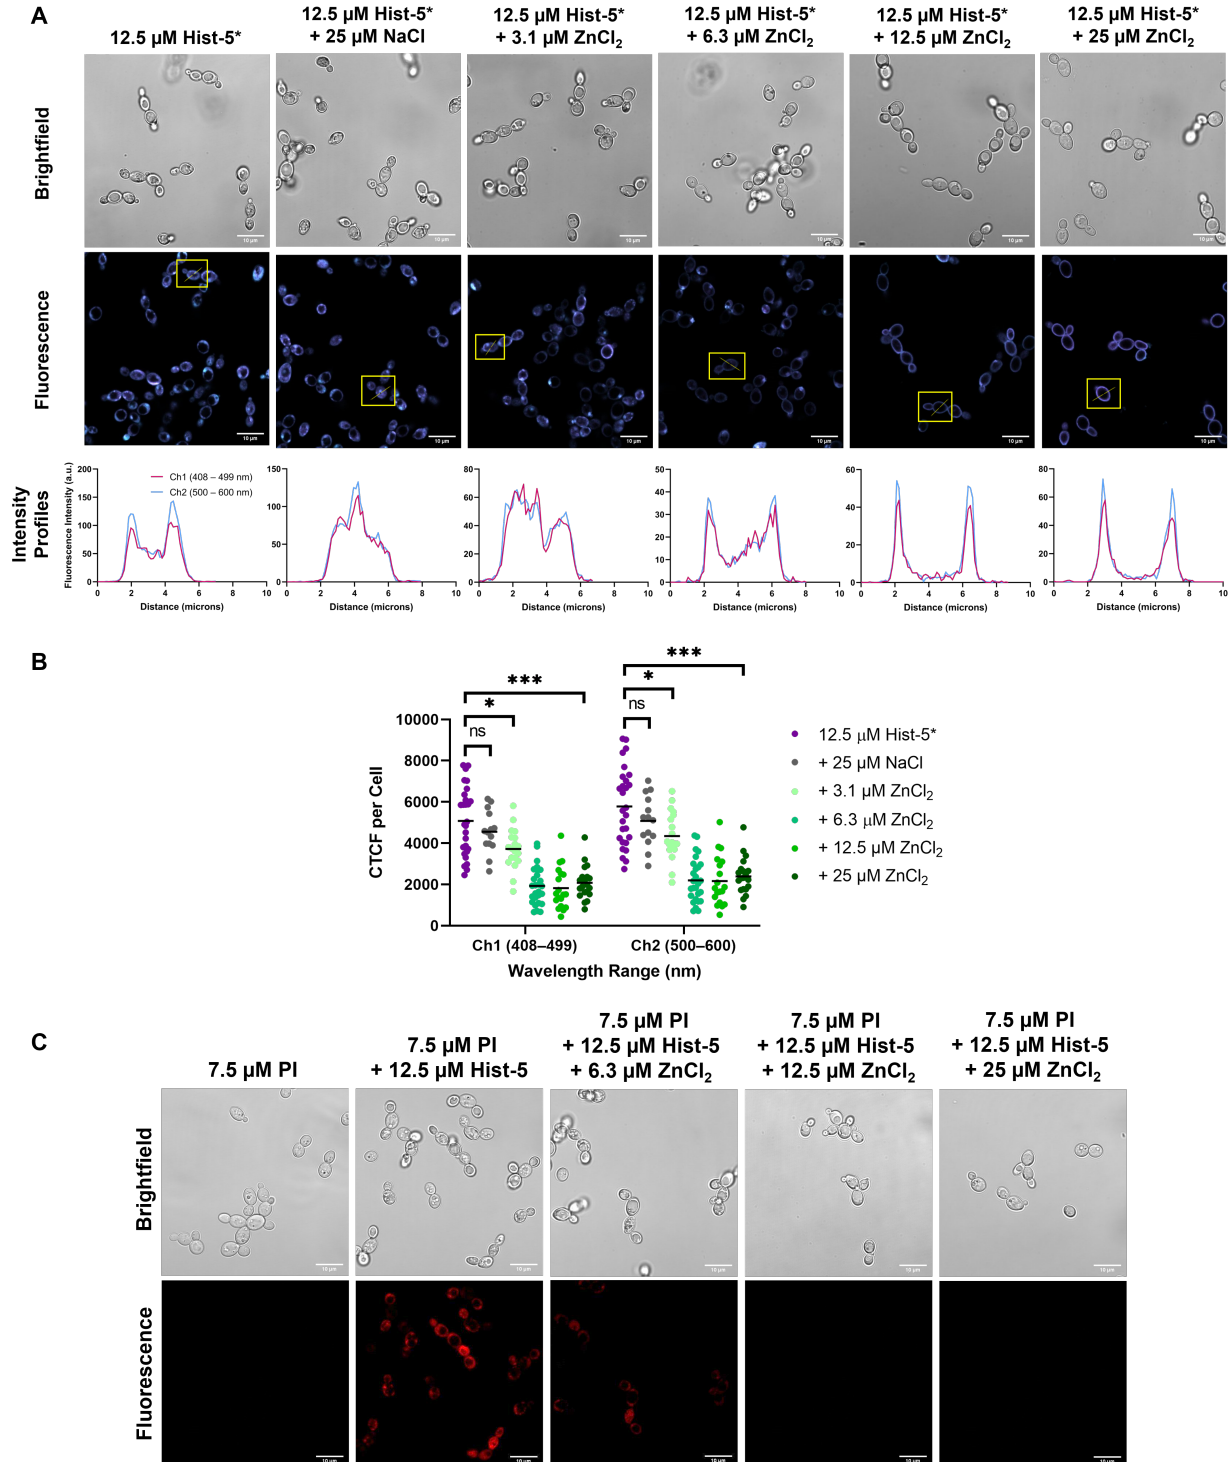

**Figure 5. Zn<sup>2+</sup> supplementation induces adhesion of peptide to the cell surface and inhibits peptide internalization and membrane activity.** (A) Confocal fluorescence microscopy images of *C. albicans* cells treated with 12.5 μM Hist-5\* alone, peptide+2 eq. NaCl, or varying concentrations of ZnCl<sub>2</sub> (0.25, 0.5, 1, or 2 eq. Zn<sup>2+</sup>) at RT for 5 min in PPB. Fluorescence intensity profiles of representative cells (yellow box) under each treatment condition are plotted against distance in microns. (B) CTCF for individual fluorescence channels under each treatment condition were quantified; error bars represent the standard deviation between three separate biological replicates. (C) Confocal microscopy images of cells treated with 12.5 μM Hist-5, 7.5 μM PI, and varying concentrations of ZnCl<sub>2</sub> (0.5, 1, or 2 eq. Zn<sup>2+</sup>) at RT for 5 min in PPB. Scale bar = 10 μm. (\* indicates p < 0.05, \*\*\* indicates p < 0.001, n = 3)

214 to the cell surface, leading to a decrease in peptide internalization, and inhibiting peptide  
215 membrane activity.

216 *C. albicans* is a polymorphic organism that transitions between yeast, pseudohyphal, and  
217 hyphal forms and the yeast to hyphae transition is critical for fungal virulence and pathogenesis<sup>45</sup>.  
218 Formation of hyphae allows *C. albicans* to invade host epithelial and endothelial cells, causing  
219 infections, such as, oral thrush and vaginal candidiasis.<sup>45</sup> Given the importance of *C. albicans*  
220 hyphae in pathogenesis, we also wanted to investigate the interactions between Hist-5 and the  
221 hyphal form of *C. albicans*. We observed internalization of Hist-5\* in *C. albicans* hyphae treated  
222 with peptide alone and found that the addition of equimolar Zn<sup>2+</sup> inhibited Hist-5\* uptake, causing  
223 the peptide to adhere to the cell surface (Figure 6A). We also investigated the membrane activity  
224 of Hist-5 on *C. albicans* hyphae and found the Hist-5 alone was able to permeabilize the cell  
225 membrane and allow leakage of PI, however, Zn<sup>2+</sup> supplementation provided a protective effect  
226 against Hist-5-induced membrane disruption (Figure 6B). These results are consistent with our  
227 observations of Zn-induced inhibition of peptide uptake and membrane activity in the yeast form  
228 of *C. albicans*.

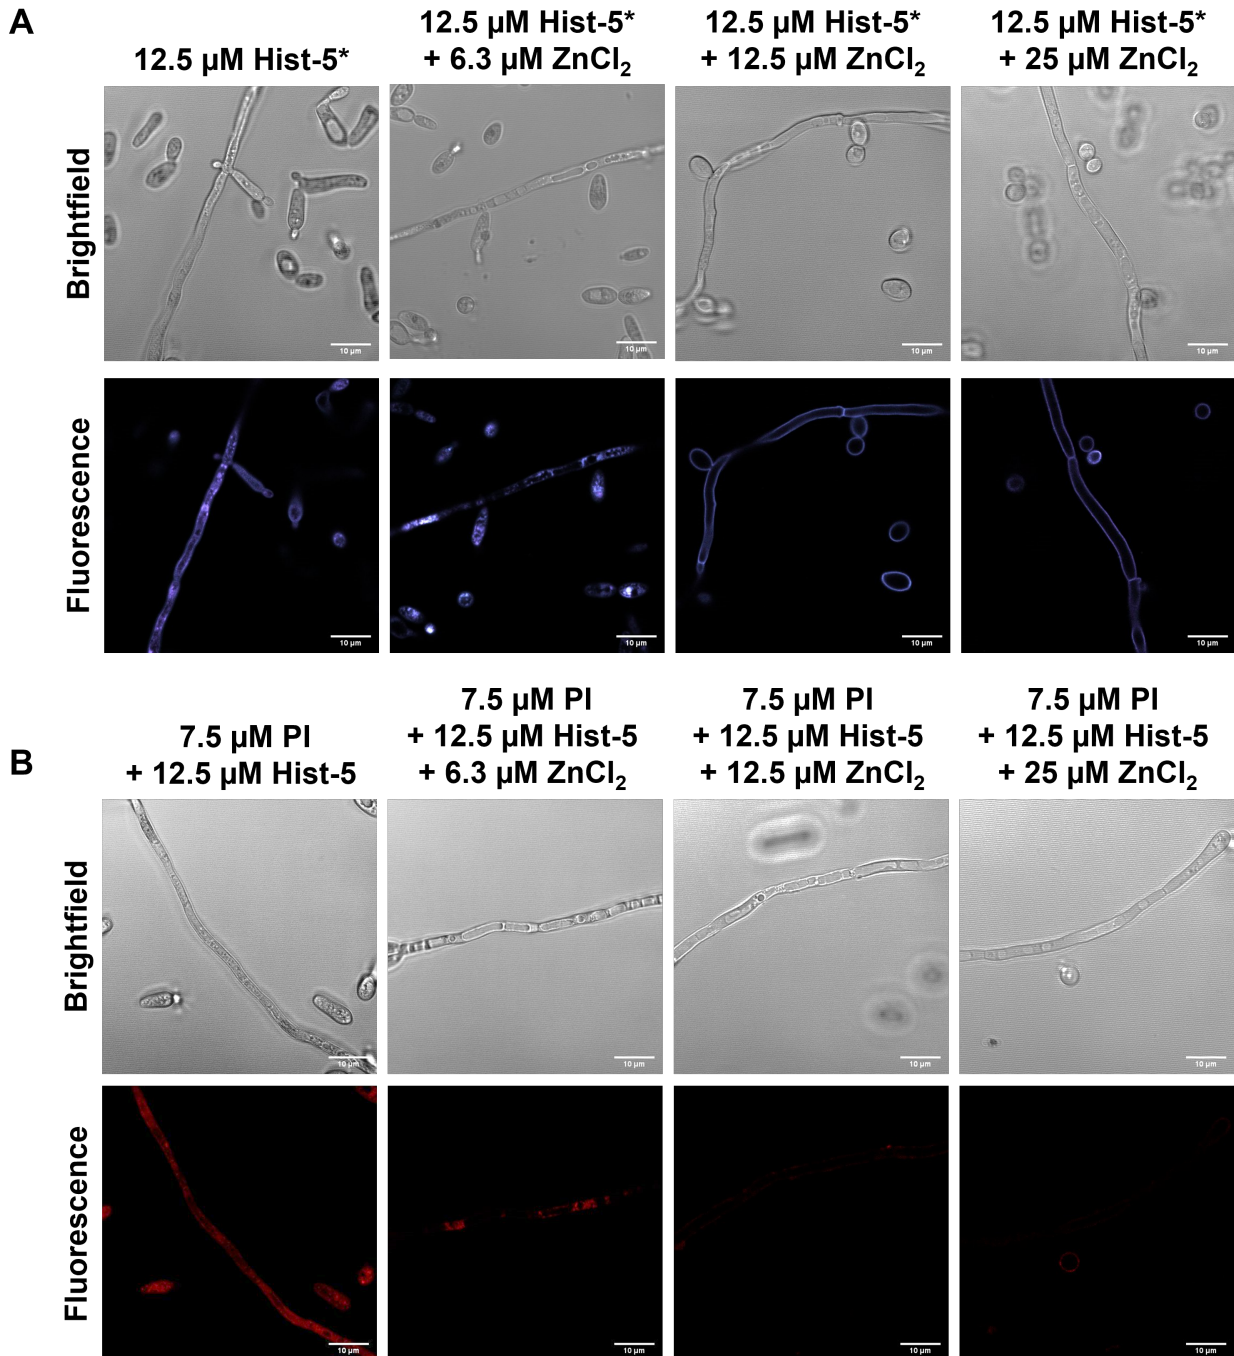

229

**Figure 6. Zn<sup>2+</sup> supplementation induces adhesion of Hist-5\* to the cell surface and inhibits peptide internalization and membrane activity in the hyphal form of *C. albicans*. (A)** Confocal fluorescence microscopy images of *C. albicans* cells in the hyphal form treated with 12.5  $\mu\text{M}$  Hist-5\* alone and varying concentrations of ZnCl<sub>2</sub> (0.5, 1, or 2 eq. Zn<sup>2+</sup>) at RT for 5 min in PPB. **(B)** Confocal microscopy images of hyphal cells treated with 12.5  $\mu\text{M}$  Hist-5, 7.5  $\mu\text{M}$  PI, and varying concentrations of ZnCl<sub>2</sub> (0.5, 1, or 2 eq. Zn<sup>2+</sup>) at RT for 5 min in PPB. Scale bar = 10  $\mu\text{m}$ .



230 **A direct interaction between Zn<sup>2+</sup> and Hist-5 results in peptide**  
231 **adhesion to the cell surface.**

232 Although we observed metal-dependent changes to Hist-5\* fluorescence response in vitro  
233 (Figure 1D), these changes in the ABD:Mca ratio were not robust enough to detect with imaging.  
234 Therefore, we were unable to use this method to distinguish whether the surface-bound signal  
235 arose from direct peptide–Zn interaction at the cell surface. To determine whether Zn-induced  
236 surface adhesion of peptide to the fungal cell stems from a direct binding interaction between Hist-  
237 5 and Zn<sup>2+</sup>, we used a Zn-responsive fluorophore to further interrogate the nature of the Zn–peptide  
238 interaction. Zinquin (ZQ) is a fluorescent Zn<sup>2+</sup> sensor that can be used to detect labile cellular Zn<sup>2+</sup>  
239 ions as well as protein-bound Zn<sup>2+</sup>.<sup>46-48</sup> When ZQ detects labile Zn<sup>2+</sup>, a fluorescent Zn(ZQ)<sub>2</sub>  
240 complex is formed which has an emission maximum centered around 500 nm. When ZQ forms an  
241 adduct with Zn-containing proteins, the emission spectrum undergoes a characteristic blue-shift to  
242 480 nm.<sup>47, 48</sup> Titration of Hist-5 into a solution of Zn(ZQ)<sub>2</sub> in PPB resulted in a clear blue shift  
243 from 500 nm to 480 nm (Figure S12), indicating that Hist-5 binds to Zn<sup>2+</sup> in a manner that enables  
244 simultaneous binding of Zn<sup>2+</sup> and ZQ to form a ternary complex in vitro.

245 Whole cell fluorescence spectroscopy experiments with *C. albicans* cells were performed  
246 to determine whether ZQ-Zn-Hist-5 complexes also form in a more complex cellular environment.  
247 Figure 7A shows fluorescence emission spectra of a suspension of cells in PPB exposed to various  
248 combinations of ZQ, Zn<sup>2+</sup> and Hist-5. Addition of ZQ alone to cells shows minimal background  
249 fluorescence which increases significantly upon addition of Zn<sup>2+</sup>, with an emission at 500 nm  
250 indicating formation of the Zn(ZQ)<sub>2</sub> complex, as expected. While the addition of Hist-5 alone did  
251 not affect the background ZQ emission, cells treated with a combination of Hist-5, ZQ, and

252 increasing amounts of  $Zn^{2+}$  resulted in an increase in the fluorescent signal. This increase in  
253 fluorescence emission was accompanied with a blue shift in the emission spectra, with cells  
254 exposed to a 1:1 or greater Zn-to-peptide molar ratio exhibiting the strongest blue shift (Figure  
255 7A), indicating an interaction between ZQ, Zn and Hist-5.

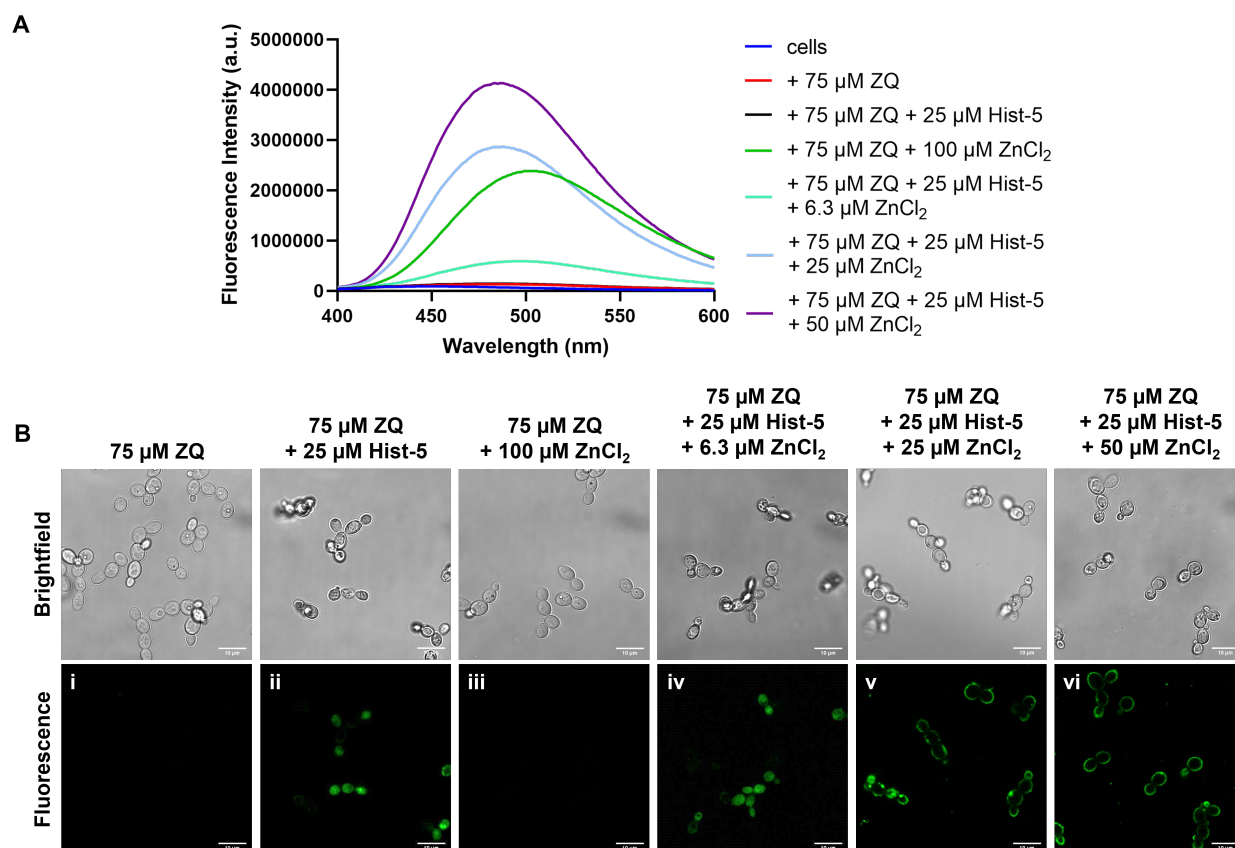

**Figure 7.  $Zn^{2+}$  binding to Hist-5 promotes adhesion to the cell surface. (A)** Titration of  $ZnCl_2$  into a solution containing 75  $\mu$ M zinquin acid (ZQ), 25  $\mu$ M Hist-5, and 200  $\mu$ L *C. albicans* ( $\sim 10^6$  cells) in PPB pH 7.4. **(B)** Confocal fluorescence microscopy images of cells treated with ZQ+  $Zn^{2+}$ , ZQ+Hist-5, and ZQ+Hist-5 and a variety of  $ZnCl_2$  concentrations (0.25, 1, and 2 eq.  $Zn^{2+}$ ) at RT for 5 min in PPB. Scale bar = 10  $\mu$ m.

256 Complementary confocal microscopy studies were also performed, using the same  
257 concentrations and treatment conditions established in our whole cell spectrofluorometry assays  
258 to investigate the location of ZQ-responsive  $Zn^{2+}$  as a function of Hist-5 treatment in *C. albicans*.

259 Although cell suspensions treated with ZQ and  $Zn^{2+}$  exhibited a strong fluorescence signal in vitro,  
260 there was no detectable fluorescence in the microscopy images of cells treated with ZQ either  
261 alone or in combination with  $Zn^{2+}$  (Figure 7B, panels i and iii). The acid form of ZQ used in these  
262 experiments is known to have poor membrane permeability, so these results indicated that the  
263 probe, even in the presence of added  $Zn^{2+}$ , does not internalize or otherwise interact with cells in  
264 a way that would produce a detectable and localized Zn-responsive signal. However, fluorescence  
265 emission was observed in the cytosol of cells treated with Hist-5 and ZQ, as well as those treated  
266 with Hist-5, ZQ, and submolar equivalencies of  $Zn^{2+}$  relative to peptide (Figure 7B, panels ii and  
267 iv). This observation could result from the membrane-disruptive effects of Hist-5, which could  
268 enable ZQ permeability and subsequent detection of intracellular accessible  $Zn^{2+}$ . In cells treated  
269 with ZQ and equimolar or higher ratios of  $Zn^{2+}$  to peptide, however, fluorescence was distinctly  
270 localized around the cell perimeter (Figure 7B, panels v and vi). This change in localization of the  
271 fluorescence response under equimolar  $Zn^{2+}$  conditions is reminiscent of the changes observed in  
272 *C. albicans* cells treated with the labeled Hist-5\* peptide and  $Zn^{2+}$ . While the microscopy images  
273 alone cannot distinguish between  $Zn(ZQ)_2$  complexes and Zn-ZQ-P ternary complexes with  
274 proteins or peptides, the combination of the fluorescence and imaging data with ZQ combined with  
275 the results from labeled Hist-5\* provide strong evidence of a direct binding interaction between  
276 Hist-5 and  $Zn^{2+}$  that changes the recognition and uptake of Hist-5 into *C. albicans* by restraining  
277 the peptide to the cell surface.

278 **Modulation of extracellular  $Zn^{2+}$  concentration by metal-binding**  
279 **molecules reverses Zn-induced surface adhesion of Hist-5.**

280 Taken together, our data show that the effects of  $Zn^{2+}$  on Hist-5 activity, uptake, and  
281 localization are dependent on  $Zn^{2+}$  concentration in the surrounding environment. In order to test  
282 whether Zn-induced binding of Hist-5 to the cell surface could be reversed by decreasing  $Zn^{2+}$   
283 availability, cells were initially exposed to peptide treated with one molar equivalent of  $Zn^{2+}$  to  
284 induce adhesion to the cell surface, then subsequently exposed to a  $Zn^{2+}$  chelating molecule. Cells  
285 were monitored over time for peptide internalization (Figure 8). Addition of the extracellular metal  
286 chelator ethylenediaminetetraacetic acid (EDTA) led to recovery of Hist-5\* internalization, as  
287 evidenced by the change in peptide localization from the cell perimeters to the cytosol (Figure 8A,  
288 left). In addition,  $Zn^{2+}$  chelation away from Hist-5 by EDTA resulted in the peptide regaining its

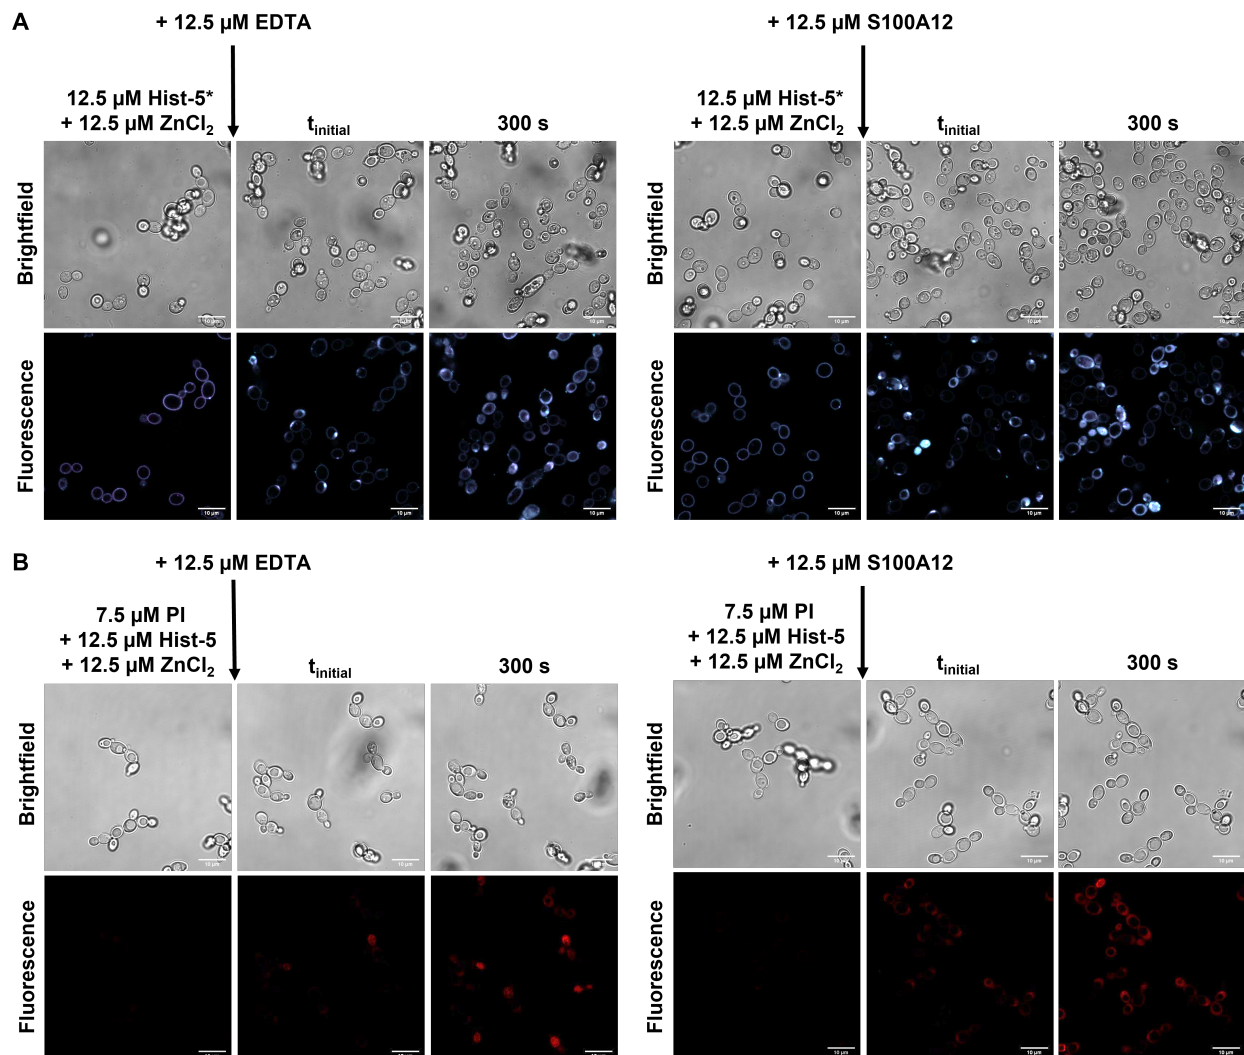

**Figure 8. Addition of Zn<sup>2+</sup> binding chelators or proteins reverses adhesion of peptide to the cell surface.** (A) Timelapse microscopy images of *C. albicans* cells treated with 12.5 μM Hist-5\*+1 eq. ZnCl<sub>2</sub> or 12.5 μM Hist-5+7.5 μM PI and 1 eq. ZnCl<sub>2</sub> for 2.5 min at RT in PPB, followed by addition of 12.5 μM EDTA, as indicated with arrow, images were collected over 300 s at RT in PPB. (B) Timelapse microscopy images of cells treated with 12.5 μM Hist-5\*+1 eq. ZnCl<sub>2</sub> or 12.5 μM Hist-5+7.5 μM PI and 1 eq. ZnCl<sub>2</sub> for 2.5 min at RT in PPB, followed by addition of 12.5 μM S100A12, as indicated with arrow, images were collected over 300 s at RT in PPB. Scale bar = 10 μm.

289 membrane disruptive activity, allowing PI leakage into the fungal cell (Figure 8A, right). EDTA  
290 has been known to cause membrane permeability on its own,<sup>49</sup> however under our conditions, PI  
291 leakage can be attributed solely to Hist-5 membrane activity, as PI uptake into the cytosol was not  
292 observed in cells treated with these concentrations of EDTA and PI (Figure S13).

293 In order to verify whether the results with EDTA could be replicated with more biologically  
294 relevant conditions, treated cells were also exposed to S100A12, a human host-defense protein  
295 that binds Zn<sup>2+</sup> with high affinity<sup>50, 51</sup> and is released during infection.<sup>52</sup> Addition of S100A12 to  
296 cells treated with Hist-5\* and an equivalent of Zn<sup>2+</sup> led to a reversal of Zn-induced surface binding  
297 of the peptide, resulting in uptake and internalization of Hist-5\* (Figure 8B, left). Treatment of  
298 fungal cells with S100A12 also led to the recovery of membrane permeabilization activity by Hist-  
299 5 and PI uptake (Figure 8B, right). These results parallel the changes in peptide internalization and  
300 activity that were observed with EDTA treatment and have interesting implications for how Hist-  
301 5 may operate in the context of the wider immune response.

## 302 Discussion

303 Although the role of Zn<sup>2+</sup> on Hist-5 antifungal activity has previously been investigated,  
304 probing how Hist-5 operates across a range of Zn<sup>2+</sup> concentrations allowed us to gain a full account  
305 of its effect on peptide activity. Throughout our studies we utilized Hist-5\* to visualize peptide

306 internalization and localization within the fungal cell. We did not observe granular intracellular  
307 distribution of Hist-5\*, in contrast to a prior report of fluorescein-labeled Hist-5 which attributed  
308 the staining effect to Hist-5 localization to mitochondria.<sup>41</sup> Instead, we observed uniform cytosolic  
309 distribution of Hist-5\* along with an apparent buildup of Hist-5\* at a localized point along the cell  
310 surface, reminiscent of the spatially restricted sites observed in a separate report of a fluorescein-  
311 labeled Hist-5 by Mochon *et al.*<sup>42</sup> Through our experiments, we found that Zn<sup>2+</sup> availability greatly  
312 affected Hist-5 antifungal activity and internalization. Our data demonstrate that submolar ratios  
313 of Zn<sup>2+</sup> to peptide improve Hist-5 antifungal activity and allow for peptide internalization (Figures  
314 3, 5, and S8). However, as the concentration of Zn<sup>2+</sup> increases, Hist-5 antifungal activity is  
315 inhibited and its uptake is blocked (Figures 3 and 5). It is likely this concentration-dependent effect  
316 of Zn<sup>2+</sup> has resulted in the varied reports regarding the effect of Zn<sup>2+</sup> on Hist-5 activity in the  
317 literature.<sup>20, 25, 28, 29</sup> While our data reveal clear Zn-dependent effects on Hist-5 activity and uptake,  
318 the question that remains is why does Zn<sup>2+</sup> affect Hist-5 in this manner?

319 *C. albicans* is a commensal organism that inhabits mucosal membranes of the human body,  
320 including the oral cavity. Under immunocompetent host conditions, *C. albicans* living in the oral  
321 environment are constantly exposed to varying levels of Hist-5,<sup>31, 35</sup> raising a question about the  
322 function of this immunopeptide beyond antifungal cell killing. In a healthy individual, is Hist-5  
323 actively entering and killing commensal microbial cells, or is there a surveillance mechanism that  
324 triggers the antifungal response when the microbial environment is disrupted and infection is  
325 initiated? Here, we add to the growing body of literature suggesting that Hist-5 may participate in  
326 interactions with cells that are not solely for antifungal purposes but rather promote and maintain  
327 microbial homeostasis for oral microbial health.<sup>29, 53</sup>

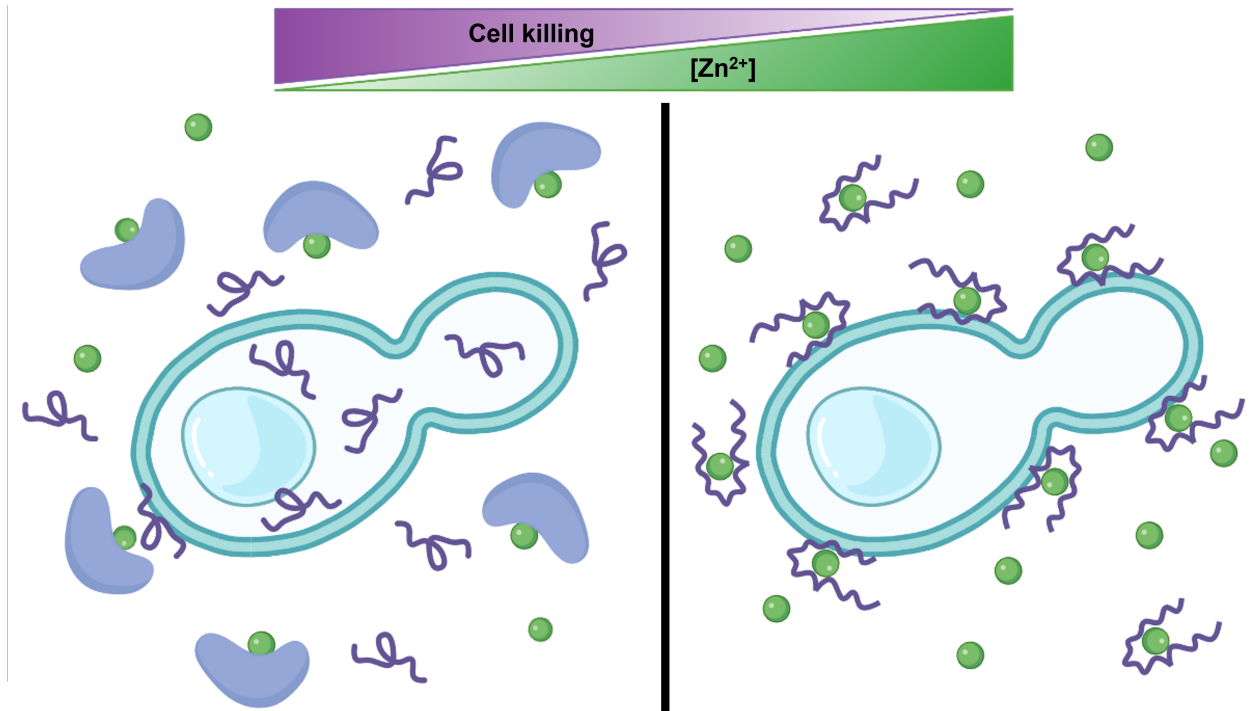

**Figure 9. Modulation of exchangeable Zn<sup>2+</sup> in the growth environment acts as a dial to tune Hist-5 antifungal activity.** Graphical representation of proposed Hist-5- Zn<sup>2+</sup> interactions and how they affect peptide internalization and activity. When Hist-5 is exposed to *C. albicans* cells in a Zn-replete environment, the peptide binds Zn<sup>2+</sup> (green spheres), adheres to the cell surface, and does not exhibit antifungal activity against the cell. When the concentration of Zn<sup>2+</sup> in the growth environment decreases due to chelation of Zn<sup>2+</sup> by host defense proteins (blue protein), Zn<sup>2+</sup> is removed from Hist-5, and the peptide internalizes into the cell allowing Hist-5 to exert its antifungal activity. Figure created with BioRender.com.

328 We propose a working model for the role of Zn<sup>2+</sup> in Hist-5 antifungal activity and  
329 commensalism where modulation of exchangeable Zn<sup>2+</sup> concentration in the growth environment  
330 acts as a dial to tune Hist-5 uptake and activity in *C. albicans* (Figure 9). When the host is healthy,  
331 commensal *C. albicans* are continuously exposed to sublethal concentrations of Hist-5 and Zn<sup>2+</sup>.  
332 This constant exposure causes the cells to become less virulent and exhibit a stress-adapted  
333 response in which they promote an anti-inflammatory signaling from oral epithelial cells by  
334 altering the composition of cell wall polysaccharides.<sup>29</sup> We hypothesize that at these  
335 concentrations of Zn<sup>2+</sup> and Hist-5, Zn-bound peptide adheres to the cell surface, but does not  
336 internalize and exert antifungal activity against the commensal *C. albicans* cells. However, the

337 switch from Hist-5 coexisting with commensal *C. albicans* to Hist-5 employing its antifungal  
338 activity could be triggered by a change in environmental  $Zn^{2+}$  concentrations, perhaps among other  
339 triggers. We showed that the inhibitory effects of  $Zn^{2+}$  on Hist-5 uptake and membrane activity  
340 were reversible by adding an extracellular chelating agent to decrease the amount of  $Zn^{2+}$  available  
341 to the peptide (Figure 8). In this model we suggest that when the host is fighting an infection that  
342 signals *C. albicans* to switch from commensal to pathogenic, a change must also be registered by  
343 Hist-5 to start exerting its antifungal properties. We posit that Hist-5 switches to act as an  
344 antifungal agent when there is a decrease in salivary  $Zn^{2+}$  availability, as the result of the body  
345 engaging the processes of nutritional immunity.<sup>38</sup> While high affinity metal chelating proteins like  
346 S100A12 are being deployed at the host-pathogen interface to deplete surrounding  $Zn^{2+}$  levels,<sup>52</sup>  
347 they also chelate  $Zn^{2+}$  away from Hist-5 enabling the peptide to exert its antifungal activity (Figure  
348 9). Hist-5 may then work to kill the pathogenic fungal cell in two ways: either by permeabilizing  
349 the cell membrane (Figure 8)<sup>25</sup> or by internalizing (Figure 8) and exhibiting the classical Hist-5  
350 antifungal mode of action.<sup>39</sup>

351 In conclusion, here we demonstrate a novel role for  $Zn^{2+}$  as a regulatory switch that can  
352 either be used to maintain commensalism between Hist-5 and *Candida* or induce antifungal  
353 activity. Our data offer context for how Hist-5 and its interactions with metals operate within the  
354 larger immune response at the host-pathogen interface.

## 355 **Experimental section.**

356 **Materials and general methods.** Chemicals and solvents were obtained from  
357 commercial suppliers and used as received unless otherwise noted. All aqueous solutions were  
358 prepared using Milli-Q water. Stock solutions were prepared either in DMSO or Milli-Q water.



359 Stock solutions of  $\text{Cu}^{2+}$  (45 mM),  $\text{Fe}^{3+}$  (100 mM),  $\text{Mn}^{2+}$  (100 mM),  $\text{Zn}^{2+}$  (10 mM), and  $\text{Co}^{2+}$   
360 (10 mM) were prepared from  $\text{CuSO}_4 \cdot 5\text{H}_2\text{O}$ ,  $\text{FeCl}_3 \cdot 6\text{H}_2\text{O}$ ,  $\text{MnCl}_2 \cdot 4\text{H}_2\text{O}$ ,  $\text{ZnCl}_2$ , and  $\text{CoCl}_2$  in Milli-  
361 Q water. Stock solutions of propidium iodide (PI, Sigma-Aldrich) and zinquin free acid (ZQ, 2-  
362 methyl-8-(toluene-p-sulfonamido)-6-quinolyloxyacetic acid, Santa Cruz Biotechnology Inc.) were  
363 prepared at 5 mg/mL in DMSO, aliquoted, frozen, and stored in the dark when not in use. Working  
364 solutions of spermidine (Spd, Acros Organics), 50 mg/mL in Milli-Q water, were prepared fresh  
365 on the day of the experiment. S100A12 homodimer protein was generously provided by Prof.  
366 Elizabeth Nolan's Lab of Massachusetts Institute of Technology.

367 **Peptide synthesis.** Peptides were synthesized on a Protein Technologies PS3 automated  
368 peptide synthesizer using rink amide MBHA low-loaded resin (Protein Technologies) on a 0.1  
369 mmol scale. All Fmoc-protected amino acids were purchased from Chem-Impex International Inc.  
370 unless otherwise stated. Amino acid coupling was achieved using O-benzotriazole-N,N,N',N'-  
371 tetramethyluronium hexafluorophosphate (HBTU, Protein Technologies) in the presence of N-  
372 methylmorpholine as an activator in N,N'-dimethylformamide (DMF) for 30 min cycles. 20%  
373 piperidine in DMF was used to deprotect Fmoc groups during the synthesis. Prior to cleavage, the  
374 resin was washed three times with 1 – 2 mL each of glacial acetic acid, then dichloromethane,  
375 followed by methanol. Side chain deprotection and peptide cleavage from the resin were achieved  
376 by treatment with 5 mL of a solution of 95% trifluoroacetic acid (TFA), 2.5% ethanedithiol, and  
377 2.5% triisopropylsilane (TIS, Sigma Aldrich) for 3.5 h under  $\text{N}_2$  gas to yield peptides with N-  
378 terminal free amines and amidated C-termini. A continuous flow of  $\text{N}_2$  gas was used to evaporate  
379 TFA to a volume of 2 mL. Afterward, the peptide was precipitated and washed three times with  
380 diethyl ether, and dried in air prior to purification.

381 **Synthesis of Hist-5\***. Doubly-labeled Hist-5\* was prepared in two steps, starting with  
382 singly labeled Hist-5Mca, which was synthesized by incorporating Fmoc-beta-(7-  
383 methoxycoumarin-4-yl)-Ala-OH (Mca, Bachem) at position 10 and Fmoc-Cys(Trt)-OH  
384 (Novabiochem) at position 24 via solid phase peptide synthesis, as described above. Purified and  
385 quantified Hist-5Mca was then reacted under basic conditions in a 1:1 molar ratio with 27.3  $\mu\text{M}$   
386 4-fluoro-7-sulfamoylbenzofurazan (ABD-F, TCI America) in DMSO for 20 min over a 60 °C  
387 water bath. Peptides were purified using a Waters 1525 reverse-phase Binary High-Performance  
388 Liquid Chromatography (HPLC) Pump on a Waters XBridge Prep C18 Column (10  $\mu\text{m}$  OBD, 19  
389 mm  $\times$  250 mm) with a 40 m linear gradient from 3 to 97% acetonitrile to water, with 0.1% TFA.  
390 Purity was validated to >95% using HPLC on a Waters XBridge Peptide BEH C18 Column (130Å,  
391 10  $\mu\text{m}$ , 4.6 mm  $\times$  250 mm) and the masses of the peptides were confirmed by electrospray  
392 ionization mass spectrometry (ESI-MS).

393 Hist-5 sequence DSHAKRHHGYKRKFHEKHSHRGY, calculated mass: 3034.5, found ( $\text{M} +$   
394  $6\text{H}^+$ ) 506.9 (Figure S2).

395 Hist-5Mca sequence: DSHAKRHHG(Mca)KRKFHEKHSHRGC, calculated mass: 3056.5,  
396 found ( $\text{M} + 4\text{H}^+$ ) 765.1 m/z (Figure S3).

397 Hist-5\* sequence DSHAKRHHG(Mca)KRKFHEKHSHRG(ABD) calculated mass: 3253.5,  
398 found ( $\text{M} + 4\text{H}^+$ ) 814.4 m/z (Figure S4).

399 **Quantification of peptide stock solutions.** Peptide stock solutions were prepared  
400 by dissolving ~0.05 g lyophilized peptide in 1 mL of Milli-Q water. The concentration of stock  
401 solutions was determined using the Edelhoch method.<sup>54</sup> In short, 4–6  $\mu\text{L}$  of peptide stock was  
402 diluted into 400  $\mu\text{L}$  of 8 mM urea to obtain an absorbance at 278 nm between 0.1 and 1 absorbance

403 unit. Absorption spectra were recorded in 1 cm quartz cuvettes on a Varian Cary 50 UV–vis  
404 spectrophotometer. The concentration of Hist-5 stock solution was determined from the  $A_{278}$   
405 readings using an extinction coefficient of  $1450 \text{ M}^{-1} \text{ cm}^{-1}$  for each tyrosine.<sup>55</sup> The concentration  
406 of Hist-5Mca and Hist-5\* stock solutions were determined from the  $A_{325}$  readings using an  
407 extinction coefficient of  $12,000 \text{ M}^{-1} \text{ cm}^{-1}$  for methoxycoumarin.<sup>56</sup> Peptide stock solutions were  
408 stored at  $-20 \text{ }^\circ\text{C}$  in sealed cryogenic storage vials.

## 409 **Fluorescence spectroscopy**

410 **Metal-dependent changes to Hist-5\* fluorescence.** Fluorescence spectra were collected  
411 in a 5 mm quartz Starna Micro fluorometer cell using an Edinburgh Instruments FS5 Fluorometer.  
412 Emission spectra for Hist-5\* were collected over 412 – 600 nm with an excitation wavelength of  
413 405 nm, using 2.0/2.0 nm excitation/emission bandwidths. Fluorescence of Hist-5\* in PPB was  
414 monitored as a function of increasing equivalents of  $\text{ZnCl}_2$  or NaCl as an anion control. The  
415 fluorescence emission from the two fluorophores were identified by wavelength ranges from 412  
416 – 499 nm for Mca and 500 – 600 nm for ABD. The sum of the fluorescence signal for each  
417 fluorophore as well as the ratio between the ABD and Mca fluorophores signals were plotted as a  
418 function of equivalents of metal added to visualize the metal-dependent changes to Hist-5\*  
419 fluorescence

420 **In vitro formation of ZQ-Zn(II) complexes.** Fluorescence spectra were collected in 5  
421 mm quartz Starna Micro fluorometer cell using an Edinburgh Instruments FS5 Fluorometer.  
422 Emission spectra were collected over 400 – 600 nm with an excitation wavelength of 370 nm,  
423 using 2.0/2.0 nm excitation/emission bandwidths. Increasing equivalents of Hist-5 were titrated  
424 into a solution containing  $25 \text{ } \mu\text{M}$  ZQ and  $12.5 \text{ } \mu\text{M}$   $\text{ZnCl}_2$  in PPB, with a final volume of  $200 \text{ } \mu\text{L}$

425 in the cuvette. For whole cell fluorescence experiments, *C. albicans* were prepared in the same  
426 manner used for microscopy experiments, described above. Increasing equivalents of ZnCl<sub>2</sub> were  
427 added into a solution containing 75 μM ZQ, 25 μM Hist-5, and 200 μL *C. albicans* (~10<sup>6</sup> cells)  
428 in PPB.

429 **Circular dichroism (CD) spectroscopy.** All CD spectra were collected using an  
430 AVIV Model 435 CD spectrometer with a 1 nm bandwidth at 25 °C. The full CD spectra of 5 μM  
431 Hist-5 and 5 μM Hist-5+100 μM ZnCl<sub>2</sub> in PPB or 98% trifluoroethanol (TFE) were collected in a  
432 1 cm quartz cuvette from 260 – 190 nm. Scans were taken using 1 nm steps with a 6 s averaging  
433 time. Data reported are the average of three scans. For titration experiments of 0 – 50 μM Hist-5  
434 in the presence of 250 μM ZnCl<sub>2</sub> in PPB or 98% TFE, scans were collected in kinetics mode using  
435 a 1 mm or 1 cm quartz cuvette for Hist-5 in PPB or TFE, respectively. Scans were taken at 198  
436 nm for Hist-5 in PPB and 222 nm for Hist-5 in TFE, with a 1 s averaging time over 60 s. The  
437 ellipticity at 198 nm was plotted against peptide concentration and fit to a linear model in GraphPad  
438 Prism (R<sup>2</sup> = 0.999). Data reported are the average of 60 scans.

439 **Synthetic defined (SD) media.** All tris-buffered synthetic defined media formulations  
440 were prepared from Chelex-treated Milli-Q water with individual addition of media components  
441 to allow for rigorous control of metal content. To deplete trace metals from water prior to media  
442 preparation, Milli-Q water was treated with Chelex 100 resin 100–200 mesh sodium form via batch  
443 method (50 g/L, Bio-Rad Laboratories). A concentrated stock of SD media not containing Cu<sup>2+</sup>,  
444 Fe<sup>3+</sup>, Mn<sup>2+</sup>, or Zn<sup>2+</sup> (10× SD-) was prepared in the Chelex-treated MilliQ water by adding glucose  
445 and yeast nitrogen base (YNB) ingredients at 10× concentrations. YNB components were added  
446 individually to avoid trace metals present in commercial YNB mixtures. To prepare working 1X

447 SD medium, 10× SD- was diluted into Chelex-treated water (1:10), and Ultra-Pure Tris-HCl  
448 (VWR) was added to a final concentration of 50 mM. The pH of the media was adjusted to 7.4  
449 using 1.0 M HCl or NaOH pellets, this media was then filter-sterilized. Finally, CuSO<sub>4</sub>, FeCl<sub>3</sub>,  
450 MnCl<sub>2</sub>, and ZnCl<sub>2</sub> were added, as appropriate to create either individual metal dropout or metal  
451 complete media (SD+).

452 **Yeast strains and culture conditions.** Fungal stocks were maintained in 25%  
453 glycerol in YPD at -80 °C. Experiments were performed with *C. albicans* clinical isolate SC5314,  
454 which was obtained from the American Type Culture Collection (ATCC). Prior to all experiments,  
455 *C. albicans* were streaked onto yeast peptone dextrose (YPD, Gibco) agar plates from frozen  
456 glycerol stocks and incubated at 30 °C for 24 h. A single colony was used to inoculate 5 mL YPD  
457 or SD+ media, which was then incubated at 30 °C, 200 rpm overnight for 16 – 18 h or 24 h,  
458 respectively, to stationary growth phase.

## 459 **Cellular growth inhibition assays.**

460 **Microdilution assays.** *C. albicans* were cultured overnight in YPD, as described above, and  
461 diluted to an optical density at 600 nm absorption (OD<sub>600</sub>) of 0.07 in PPB pH 7.4 and used as the  
462 working culture. Peptides to be tested were serially diluted 2-fold in PPB from aqueous stocks and  
463 plated in a clear, flat-bottomed 96-well plate. 100 μL of the working culture of cells were then  
464 added to the 96-well plate, containing PPB and peptide, to a final OD<sub>600</sub> of 0.035 and a final volume  
465 of 200 μL per well. Final concentrations of peptide in the plate are indicated in the figure axes. For  
466 each experiment, a peptide-free positive growth control and a cell-free, negative control were  
467 included. This plate was incubated for 1.5 h at 37 °C, 200 rpm to allow time for peptide to interact  
468 with cells. After incubation, 10 μL aliquots from the plate were added to a new 96-well plate

469 containing 190  $\mu\text{L}$  YPD media with a final volume of 200  $\mu\text{L}$  per well. The new media plate was  
470 then incubated for 48 h at 30  $^{\circ}\text{C}$ , 200 rpm. All media plates were covered with air-permeable  
471 AeraSeal film (Sigma) to minimize evaporation. Fungal growth was evaluated via  $\text{OD}_{600}$  using a  
472 PerkinElmer Victor3 V multilabel plate reader at 0, 24, and 48 h.  $\text{OD}_{600}$  values were normalized  
473 to the positive growth control and adjusted by subtracting the 0 h timepoint readings from other  
474 timepoint data at 24 and 48 h, to remove any background signal from YPD. Data are representative  
475 of three biological replicates, each with three technical replicates per experiment. For a single  
476 experiment, each of the three replicate conditions were averaged and the error was calculated as  
477 standard deviation, which is indicated by error bars in the figures. Final 48 h timepoint data is  
478 reported by plotting  $\text{OD}_{600}$  readings versus peptide concentration.

479 **Two-dimensional broth microdilution checkerboard assays.** *C. albicans* were  
480 cultured overnight in  $\text{SD}^{+}$  media, as described in the yeast strains and culture conditions section  
481 and diluted to an  $\text{OD}_{600}$  of 0.07 in PPB pH 7.4 and used as the working culture. Peptides to be  
482 tested were serially diluted from aqueous stocks 2-fold in PPB, right to left along the row in a  
483 clear, flat-bottomed 96-well plate.  $\text{ZnCl}_2$  was serially diluted from aqueous stock in water, down  
484 the column of the plate. Aliquots of 180  $\mu\text{L}$  of the working culture of cells were then added to the  
485 96-well plate, containing PPB, peptide, and  $\text{Zn}^{2+}$ , to a final  $\text{OD}_{600}$  of 0.06 and a final volume of  
486 200  $\mu\text{L}$  per well. Final concentrations of peptide and  $\text{Zn}^{2+}$  in the plate are indicated in the figure  
487 axes. This plate was incubated for 1.5 h at 37  $^{\circ}\text{C}$ , 200 rpm. After incubation, 10  $\mu\text{L}$  aliquots from  
488 the plate were added to three new 96-well plates containing 190  $\mu\text{L}$  of  $\text{SD-Zn}$  or  $\text{SD}^{+}$  media with  
489 a final volume of 200  $\mu\text{L}$  per well. The new  $\text{SD-Zn}$  or  $\text{SD}^{+}$  media plates were covered with  
490 AeraSeal film and incubated for 48 h at 30  $^{\circ}\text{C}$  and fungal growth measurements were taken as  
491 described above in the microdilution assays section.  $\text{OD}_{600}$  values were normalized to the positive

492 growth control and adjusted by subtracting the 0 h timepoint readings from other timepoint data at  
493 24 and 48 h, to remove any background signal from the media. Data are representative of three  
494 biological replicates, each with three technical replicates per experiment. To visualize the results,  
495 a final heatmap was generated in GraphPad Prism using average OD<sub>600</sub> values from the biological  
496 replicates at 48 h. Concentrations of peptide and Zn<sup>2+</sup> indicated in the figure represent the amount  
497 of peptide and Zn<sup>2+</sup> present in the preincubation plate.

## 498 **Confocal fluorescence microscopy**

499 **Preparation of *C. albicans* in the yeast form for microscopy.** *C. albicans* were  
500 cultured overnight in YPD, as described in the yeast strains and culture conditions section. Cells  
501 from the overnight culture were then diluted either 1:100 or 1:50 in 5 mL fresh YPD media. The  
502 subculture was allowed to grow to an OD<sub>600</sub> of 1.0 at 30 °C, 200 rpm. Cells were pelleted at 5000  
503 rpm for 20 min to remove excess media and then resuspended in PPB pH 7.4 for imaging.

504 **Preparation of *C. albicans* in the hyphal form for microscopy.** *C. albicans* were  
505 cultured overnight for 24 h in SD+ medium. After 24 h, cells in the overnight culture were diluted  
506 to an OD<sub>600</sub> of 0.1 in fresh SD+ medium. The diluted cells were then aliquoted into two equal  
507 portions of 2 mL each. To induce hyphal formation, one of the subcultures was treated with 12.5  
508 mM N-Acetylglucosamine (GlcNAc), the second subculture was left untreated as a control. The  
509 two subcultures were grown at 37 °C, 200 rpm for a further 24 h. Cells from the +GlcNAc and  
510 untreated control cultures were pelleted at 5000 rpm for 20 min to remove excess media. Cells  
511 from the two cultures were then resuspended in PPB pH 7.4 for imaging.

512 **General microscopy parameters and setup.** All experiments were performed using live  
513 cells, in the yeast form (unless otherwise stated) at room temperature, suspended in PPB, and plated

514 into an ibidi  $\mu$ -Slide 18 well to a final volume of 40  $\mu$ L per well. Confocal images were acquired  
515 with a Zeiss 880 Ariyscan Inverted Confocal microscope using Plan Apochromat 63x/1.4 oil  
516 objectives. For most experiments, images were taken in 25 s intervals from 0 – 5 min, unless  
517 otherwise indicated. Images were obtained as 10–20 optical slices per wavelength spaced 0.5  $\mu$ m  
518 apart along the Z-axis. Images presented are cells in the middle image of a Z-stack after 5 min of  
519 treatment with peptide, metal or dye, and are representative of cells in experiments conducted on  
520 three separate days. For experiments involving Hist-5\*, the 405 nm diode laser was used to excite  
521 the two fluorophores. Fluorescence was detected over 408 – 499 nm for Mca using channel 1 and  
522 500 – 600 nm for ABD using channel 2. Generally, Fiji software was used for image acquisition  
523 and processing. MATLAB ver.R2021b (MathWorks Natick, MA) software was used to conduct  
524 bulk image intensity analysis and determine corrected total cell fluorescence (CTCF) values per  
525 cell for all images, the full MATLAB script may be accessed in the supporting information. Each  
526 dot in the fluorescence intensity plots represents CTCF values of individual cells in images from  
527 experiments performed on separate days.

528 **Hist-5\* uptake and internalization over time.** *C. albicans* were prepared for microscopy  
529 as described in the preparation of *C. albicans* for microscopy section. Cells were treated with 12.5  
530  $\mu$ M Hist-5\* and uptake of the peptide was monitored via timelapse microscopy over 30 min with  
531 images being taken every 2 min. MATLAB software was used to perform image intensity analysis  
532 and plot CTCF intensity per cell for each channel over time. Error bars represent the standard  
533 deviation in CTCF values from experiments performed on three separate days.

534 **Spermidine (Spd) Hist-5 competition assays.** *C. albicans* were prepared for microscopy  
535 as described in the preparation of *C. albicans* for microscopy section. Cells were treated with 12.5  
536  $\mu$ M Hist-5\* and either 100  $\mu$ M Spd, 12.5  $\mu$ M Hist-5 or an equal volume of PPB as a vehicle control.



537 Uptake of Hist-5\* is shown in the microscopy images after 5 min and MATLAB software was  
538 used to perform image intensity analysis and plot CTCF intensity for each treatment condition.  
539 Statistical differences in CTCF values between treatments were calculated using an ordinary one-  
540 way ANOVA with Dunnett's multiple comparison test in GraphPad Prism.

541 **Effects of Zn<sup>2+</sup> addition on Hist-5\* and Hist-5 uptake and membrane activity.**

542 *C. albicans* were prepared for microscopy as described in the preparation of *C. albicans* for  
543 microscopy section. Cells were treated with 12.5 μM Hist-5\* and the desired concentrations of  
544 ZnCl<sub>2</sub> or NaCl as an anion control. Uptake of Hist-5\* is shown in the microscopy images after 5  
545 min and MATLAB software was used to perform image intensity analysis and plot CTCF intensity  
546 for each treatment condition. Statistical differences in CTCF values between treatments were  
547 calculated using an ordinary one-way ANOVA with Dunnett's multiple comparison test in  
548 GraphPad Prism. Fiji software was used to generate intensity profiles for individual cells in an  
549 image. For membrane permeability assays, cells were treated with 7.5 μM PI, 12.5 μM Hist-5, and  
550 the desired concentrations of ZnCl<sub>2</sub>. Uptake of PI is shown after 5 min treatment. PI was excited  
551 using the 488 nm line of the argon ion laser and fluorescence was detected over 600 – 700 nm.

552 **Zn-dependent changes in Hist-5\* and Hist-5 uptake and membrane activity in**

553 **the *C. albicans* hyphal form.** Hyphal formation was induced in *C. albicans* and the cells  
554 were prepared for microscopy as described in the preparation of *C. albicans* in the hyphal form for  
555 microscopy section. Cells were treated with 12.5 μM Hist-5\* and the desired concentrations of  
556 ZnCl<sub>2</sub> and uptake of Hist-5\* is shown in the microscopy images after 5 min. For membrane  
557 permeability assays, cells were treated with 7.5 μM PI, 12.5 μM Hist-5, and the desired  
558 concentrations of ZnCl<sub>2</sub>. Uptake of PI is shown after 5 min treatment. PI was excited using the 488  
559 nm line of the argon ion laser and fluorescence was detected over 600 – 700 nm.

560 **Fluorescence microscopy of ZQ-Zn(II) complexes.** *C. albicans* were prepared for  
561 microscopy as described in the preparation of *C. albicans* for microscopy section. Cells were  
562 treated with 75  $\mu$ M ZQ, 25  $\mu$ M Hist-5 and the desired concentrations of ZnCl<sub>2</sub>. Fluorescence  
563 signals from ZQ complexes are shown after 5 min in the microscopy images. ZQ was excited with  
564 a 405 nm diode laser and fluorescence was detected over 420 – 600 nm.

565 **Zinc chelation assays.** *C. albicans* were prepared for microscopy as described in the  
566 preparation of *C. albicans* for microscopy section. Cells were initially treated with either 12.5  $\mu$ M  
567 Hist-5\* or Hist-5+PI and 12.5  $\mu$ M ZnCl<sub>2</sub>. Peptide and Zn<sup>2+</sup> treated cells were imaged for 2.5 min  
568 via timelapse microscopy to visualize surface adhesion of the peptide to the fungal cell. These cells  
569 were then exposed to 12.5  $\mu$ M of a metal chelating agent, either EDTA or S100A12 protein and  
570 the cells were imaged via timelapse microscopy for a further 5 min. Uptake of either Hist-5\* or PI  
571 after 5 min treatment with the chelating agent is shown in the microscopy images. PI was excited  
572 using the 488 nm line of the argon ion laser and fluorescence was detected over 600 – 700 nm.

## 573 **Supporting Information.**

574 The Supporting Information is available free of charge.

- 575 • Synthetic and peptide characterization details, Figures S1–S13 showing additional  
576 fluorescence microscopy images, spectra, growth assays, and MATLAB script.

577

578 **Author Contributions.** JXC and KJF conceived and designed the experiments. JXC

579 carried out the experiments. SG performed CD experiments, KSA wrote and implemented

580 MATLAB script for image analysis. JXC and KJF analyzed the data and wrote the manuscript,  
581 with contributions from all coauthors.

582 **Acknowledgements.** The antifungal and biological work presented here was supported  
583 by the National Institutes of Health (Grant R01GM084176), with funding from the National  
584 Science Foundation supporting the metal-binding chemistry (NSF CHE-1808710). We  
585 acknowledge the Duke Light Microscopy Core Facility, with funding from the shared  
586 instrumentation grant (1S10RR027867-01). We thank Prof. Elizabeth Nolan's Lab at  
587 Massachusetts Institute of Technology for generously providing the S100A12 homodimer protein,  
588 and Dr. Catherine Denning-Jannace for help with hyphal cells.

589

590 **Abbreviations.** Histatin-5, Hist-5; fluorescent histatin-5, Hist-5\*; methoxycoumarin,  
591 Mca; sulfamoylbenzofurazan, ABD; potassium phosphate buffer, PPB; room temperature, RT;  
592 spermidine, Spd; optical density at 600 nm, OD<sub>600</sub>; minimum inhibitory concentration, MIC;  
593 corrected total cell fluorescence, CTCF; synthetic defined media, SD; circular dichroism, CD;  
594 trifluoroethanol, TFE; propidium iodide, PI; zinquin free acid form, ZQ;  
595 ethylenediaminetetraacetic acid, EDTA; solid phase peptide synthesis, SPPS; electrospray  
596 ionization mass spectrometry, ESI-MS.

597

## 598 **References**

- 599 1. Oppenheim, F. G.; Xu, T.; McMillian, F. M.; Levitz, S. M.; Diamond, R. D.; Offner, G.  
600 D.; Troxler, R. F., Histatins, a novel family of histidine-rich proteins in human parotid  
601 secretion. Isolation, characterization, primary structure, and fungistatic effects on *Candida*  
602 *albicans*. *J Biol Chem* **1988**, *263* (16), 7472-7.
- 603 2. Raj, P. A.; Edgerton, M.; Levine, M. J., Salivary histatin 5: dependence of sequence, chain  
604 length, and helical conformation for candidacidal activity. *J Biol Chem* **1990**, *265* (7),  
605 3898-905.
- 606 3. Xu, T.; Levitz, S. M.; Diamond, R. D.; Oppenheim, F. G., Anticandidal activity of major  
607 human salivary histatins. *Infect Immun* **1991**, *59* (8), 2549-54.
- 608 4. Driscoll, J.; Duan, C.; Zuo, Y.; Xu, T.; Troxler, R.; Oppenheim, F. G., Candidacidal  
609 activity of human salivary histatin recombinant variants produced by site-directed  
610 mutagenesis. *Gene* **1996**, *177* (1-2), 29-34.
- 611 5. Tsai, H.; Raj, P. A.; Bobek, L. A., Candidacidal activity of recombinant human salivary  
612 histatin-5 and variants. *Infect Immun* **1996**, *64* (12), 5000-7.

- 613 6. Li, X. W. S.; Reddy, M. S.; Baev, D.; Edgerton, M., Candida albicans Ssa1/2p is the cell  
614 envelope binding protein for human salivary histatin 5. *J Biol Chem* **2003**, *278* (31), 28553-  
615 28561.
- 616 7. Li, X. W. S.; Sun, J. N. N.; Okamoto-Shibayama, K.; Edgerton, M., Candida albicans cell  
617 wall Ssa proteins bind and facilitate import of salivary histatin 5 required for toxicity. *J*  
618 *Biol Chem* **2006**, *281* (32), 22453-22463.
- 619 8. Sun, J. N. N.; Li, W. S.; Jang, W. S.; Nayyar, N.; Sutton, M. D.; Edgerton, M., Uptake  
620 of the antifungal cationic peptide Histatin 5 by Candida albicans Ssa2p requires binding to  
621 non-conventional sites within the ATPase domain. *Mol Microbiol* **2008**, *70* (5), 1246-1260.
- 622 9. Jang, W. S.; Bajwa, J. S.; Sun, J. N.; Edgerton, M., Salivary histatin 5 internalization by  
623 translocation, but not endocytosis, is required for fungicidal activity in Candida albicans.  
624 *Mol Microbiol* **2010**, *77* (2), 354-370.
- 625 10. Kumar, R.; Chadha, S.; Saraswat, D.; Bajwa, J. S.; Li, R. A.; Conti, H. R.; Edgerton,  
626 M., Histatin 5 Uptake by Candida albicans Utilizes Polyamine Transporters Dur3 and  
627 Dur31 Proteins. *J Biol Chem* **2011**, *286* (51), 43748-43758.
- 628 11. Baev, D.; Li, X. W. S.; Dong, J.; Keng, P.; Edgerton, M., Human salivary histatin 5  
629 causes disordered volume regulation and cell cycle arrest in Candida albicans. *Infect*  
630 *Immun* **2002**, *70* (9), 4777-4784.
- 631 12. Li, X. S.; Baev, D.; Keng, P. C.; Edgerton, M., Salivary histatin 5 causes cell size  
632 reduction and G0/G1 cell cycle arrest in Candida albicans. *J Dent Res* **2002**, *81*, A235-  
633 A235.
- 634 13. Helmerhorst, E. J.; Troxler, R. F.; Oppenheim, F. G., The human salivary peptide histatin  
635 5 exerts its antifungal activity through the formation of reactive oxygen species. *P Natl*  
636 *Acad Sci USA* **2001**, *98* (25), 14637-14642.
- 637 14. Koshlukova, S. E.; Lloyd, T. L.; Araujo, M. W.; Edgerton, M., Salivary histatin 5 induces  
638 non-lytic release of ATP from Candida albicans leading to cell death. *J Biol Chem* **1999**,  
639 *274* (27), 18872-9.
- 640 15. Baev, D.; Rivetta, A.; Li, X. S.; Vylkova, S.; Bashi, E.; Slayman, C. L.; Edgerton, M.,  
641 Killing of Candida albicans by human salivary histatin 5 is modulated, but not determined,  
642 by the potassium channel TOK1. *Infect Immun* **2003**, *71* (6), 3251-3260.
- 643 16. Baev, D.; Rivetta, A.; Vylkova, S.; Sun, J. N. N.; Zeng, G. F.; Slayman, C. L.; Edgerton,  
644 M., The TRK1 potassium transporter is the critical effector for killing of Candida albicans  
645 by the cationic protein, Histatin 5. *J Biol Chem* **2004**, *279* (53), 55060-55072.
- 646 17. Gusman, H.; Lendenmann, U.; Grogan, J.; Troxler, R. F.; Oppenheim, F. G., Is salivary  
647 histatin 5 a metalloprotein? *Bba-Protein Struct M* **2001**, *1545* (1-2), 86-95.
- 648 18. Grogan, J.; McKnight, C. J.; Troxler, R. F.; Oppenheim, F. G., Zinc and copper bind to  
649 unique sites of histatin 5. *Febs Lett* **2001**, *491* (1-2), 76-80.
- 650 19. Conklin, S. E.; Bridgman, E. C.; Su, Q.; Riggs-Gelasco, P.; Haas, K. L.; Franz, K. J.,  
651 Specific Histidine Residues Confer Histatin Peptides with Copper-Dependent Activity  
652 against Candida albicans. *Biochemistry-Us* **2017**, *56* (32), 4244-4255.
- 653 20. Puri, S.; Li, R.; Ruszaj, D.; Tati, S.; Edgerton, M., Iron Binding Modulates Candidacidal  
654 Properties of Salivary Histatin 5. *J Dent Res* **2015**, *94* (1), 201-208.
- 655 21. McCaslin, T. G.; Pagba, C. V.; Yohannan, J.; Barry, B. A., Specific metallo-protein  
656 interactions and antimicrobial activity in Histatin-5, an intrinsically disordered salivary  
657 peptide. *Sci Rep-Uk* **2019**, *9*.
- 658 22. Hooper, N. M., Families of zinc metalloproteases. *Febs Lett* **1994**, *354* (1), 1-6.

- 659 23. Fukasawa, K. M.; Hata, T.; Ono, Y.; Hirose, J., Metal preferences of zinc-binding motif  
660 on metalloproteases. *J Amino Acids* **2011**, *2011*, 574816.
- 661 24. Melino, S.; Rufini, S.; Sette, M.; Morero, R.; Grottesi, A.; Paci, M.; Petruzzelli, R.,  
662 Zn(2+) ions selectively induce antimicrobial salivary peptide histatin-5 to fuse negatively  
663 charged vesicles. Identification and characterization of a zinc-binding motif present in the  
664 functional domain. *Biochemistry-Us* **1999**, *38* (30), 9626-33.
- 665 25. Norris, H. L.; Kumar, R.; Ong, C. Y.; Xu, D.; Edgerton, M., Zinc Binding by Histatin 5  
666 Promotes Fungicidal Membrane Disruption in *C. albicans* and *C. glabrata*. *J Fungi* **2020**,  
667 *6* (3).
- 668 26. Gusman, H.; Flora, B.; Troxler, R. F.; Oppenheim, F. G., Quantification of histatin 1, 3  
669 and 5 in glandular salivary secretions using zinc precipitation. *J Dent Res* **2002**, *81*, A403-  
670 A403.
- 671 27. Cragnell, C.; Staby, L.; Lenton, S.; Kragelund, B. B.; Skepo, M., Dynamical  
672 Oligomerisation of Histidine Rich Intrinsically Disordered ProteinS Is Regulated through  
673 Zinc-Histidine Interactions. *Biomolecules* **2019**, *9* (5).
- 674 28. Porciatti, E.; Milenkovic, M.; Gaggelli, E.; Valensin, G.; Kozlowski, H.; Kamysz, W.;  
675 Valensin, D., Structural characterization and antimicrobial activity of the Zn(II) complex  
676 with P113 (demegen), a derivative of histatin 5. *Inorg Chem* **2010**, *49* (19), 8690-8.
- 677 29. Norris, H. L.; Kumar, R.; Edgerton, M., A Novel Role for Histatin 5 in Combination with  
678 Zinc to Promote Commensalism in *C. albicans* Survivor Cells. *Pathogens* **2021**, *10* (12).
- 679 30. Dale, B. A.; Fredericks, L. P., Antimicrobial peptides in the oral environment: expression  
680 and function in health and disease. *Curr Issues Mol Biol* **2005**, *7* (2), 119-33.
- 681 31. Khan, S. A.; Fidel, P. L., Jr.; Thunayyan, A. A.; Varlotta, S.; Meiller, T. F.; Jabra-Rizk,  
682 M. A., Impaired Histatin-5 Levels and Salivary Antimicrobial Activity against *C. albicans*  
683 in HIV Infected Individuals. *J AIDS Clin Res* **2013**, *4* (193).
- 684 32. Sejdini, M.; Begzati, A.; Salihu, S.; Krasniqi, S.; Berisha, N.; Aliu, N., The Role and  
685 Impact of Salivary Zn Levels on Dental Caries. *Int J Dent* **2018**, *2018*, 8137915.
- 686 33. Norris, H. L.; Friedman, J.; Chen, Z.; Puri, S.; Wilding, G.; Edgerton, M., Salivary  
687 metals, age, and gender correlate with cultivable oral *Candida* carriage levels. *J Oral*  
688 *Microbiol* **2018**, *10* (1), 1447216.
- 689 34. Davis, E.; Bakulski, K. M.; Goodrich, J. M.; Peterson, K. E.; Marazita, M. L.; Foxman,  
690 B., Low levels of salivary metals, oral microbiome composition and dental decay. *Sci Rep*  
691 **2020**, *10* (1), 14640.
- 692 35. Campese, M.; Sun, X.; Bosch, J. A.; Oppenheim, F. G.; Helmerhorst, E. J., Concentration  
693 and fate of histatins and acidic proline-rich proteins in the oral environment. *Arch Oral*  
694 *Biol* **2009**, *54* (4), 345-53.
- 695 36. Bales, C. W.; Freeland-Graves, J. H.; Askey, S.; Behmardi, F.; Pobocik, R. S.; Fickel,  
696 J. J.; Greenlee, P., Zinc, magnesium, copper, and protein concentrations in human saliva:  
697 age- and sex-related differences. *Am J Clin Nutr* **1990**, *51* (3), 462-9.
- 698 37. Shankar, A. H.; Prasad, A. S., Zinc and immune function: the biological basis of altered  
699 resistance to infection. *Am J Clin Nutr* **1998**, *68* (2 Suppl), 447S-463S.
- 700 38. Gammoh, N. Z.; Rink, L., Zinc in Infection and Inflammation. *Nutrients* **2017**, *9* (6).
- 701 39. Puri, S.; Edgerton, M., How Does It Kill?: Understanding the Candidacidal Mechanism of  
702 Salivary Histatin 5. *Eukaryot Cell* **2014**, *13* (8), 958-964.

- 703 40. Zolin, G. V. S.; Da Fonseca, F. H.; Zambom, C. R.; Garrido, S. S., Histatin 5  
704 Metallopeptides and Their Potential against *Candida albicans* Pathogenicity and Drug  
705 Resistance. *Biomolecules* **2021**, *11* (8).
- 706 41. Helmerhorst, E. J.; Breeuwer, P.; van't Hof, W.; Walgreen-Weterings, E.; Oomen, L. C.  
707 J. M.; Veerman, E. C. I.; Amerongen, A. V. N.; Abee, T., The cellular target of histatin 5  
708 on *Candida albicans* is the energized mitochondrion. *J Biol Chem* **1999**, *274* (11), 7286-  
709 7291.
- 710 42. Mochon, A. B.; Liu, H., The antimicrobial peptide histatin-5 causes a spatially restricted  
711 disruption on the *Candida albicans* surface, allowing rapid entry of the peptide into the  
712 cytoplasm. *PLoS Pathog* **2008**, *4* (10), e1000190.
- 713 43. Raj, P. A.; Soni, S. D.; Levine, M. J., Membrane-induced helical conformation of an active  
714 candidacidal fragment of salivary histatins. *J Biol Chem* **1994**, *269* (13), 9610-9.
- 715 44. Franchini, P. L.; Reid, R. E., A model for circular dichroism monitored dimerization and  
716 calcium binding in an EF-hand synthetic peptide. *J Theor Biol* **1999**, *199* (2), 199-211.
- 717 45. Sudbery, P. E., Growth of *Candida albicans* hyphae. *Nat Rev Microbiol* **2011**, *9* (10), 737-  
718 48.
- 719 46. Zalewski, P. D.; Forbes, I. J.; Betts, W. H., Correlation of apoptosis with change in  
720 intracellular labile Zn(II) using zinquin [(2-methyl-8-p-toluenesulphonamido-6-  
721 quinolyloxy)acetic acid], a new specific fluorescent probe for Zn(II). *Biochem J* **1993**, *296*  
722 ( Pt 2), 403-8.
- 723 47. Nowakowski, A. B.; Petering, D. H., Reactions of the fluorescent sensor, Zinquin, with the  
724 zinc-proteome: adduct formation and ligand substitution. *Inorg Chem* **2011**, *50* (20),  
725 10124-33.
- 726 48. Nowakowski, A. B.; Meeusen, J. W.; Menden, H.; Tomasiewicz, H.; Petering, D. H.,  
727 Chemical-Biological Properties of Zinc Sensors TSQ and Zinquin: Formation of Sensor-  
728 Zn-Protein Adducts versus Zn(Sensor)<sub>2</sub> Complexes. *Inorg Chem* **2015**, *54* (24), 11637-47.
- 729 49. Vaara, M., Agents that increase the permeability of the outer membrane. *Microbiol Rev*  
730 **1992**, *56* (3), 395-411.
- 731 50. Moroz, O. V.; Burkitt, W.; Wittkowski, H.; He, W.; Ianoul, A.; Novitskaya, V.; Xie,  
732 J.; Polyakova, O.; Lednev, I. K.; Shekhtman, A.; Derrick, P. J.; Bjoerk, P.; Foell, D.;  
733 Bronstein, I. B., Both Ca<sup>2+</sup> and Zn<sup>2+</sup> are essential for S100A12 protein oligomerization  
734 and function. *BMC Biochem* **2009**, *10*, 11.
- 735 51. Cunden, L. S.; Gaillard, A.; Nolan, E. M., Calcium Ions Tune the Zinc-Sequestering  
736 Properties and Antimicrobial Activity of Human S100A12. *Chem Sci* **2016**, *7* (2), 1338-  
737 1348.
- 738 52. Zackular, J. P.; Chazin, W. J.; Skaar, E. P., Nutritional Immunity: S100 Proteins at the  
739 Host-Pathogen Interface. *J Biol Chem* **2015**, *290* (31), 18991-8.
- 740 53. Stewart, L.; Hong, Y.; Holmes, I.; Firth, S.; Bolton, J.; Santos, Y.; Cobb, S.; Jakubovics,  
741 N.; Djoko, K., The role of metal binding in the function of the human salivary antimicrobial  
742 peptide histatin-5. *bioRxiv* **2022**, 2022.01.07.472205.
- 743 54. Edelhoch, H., Spectroscopic determination of tryptophan and tyrosine in proteins.  
744 *Biochemistry-U.S.* **1967**, *6* (7), 1948-54.
- 745 55. Gill, S. C.; von Hippel, P. H., Calculation of protein extinction coefficients from amino  
746 acid sequence data. *Anal Biochem* **1989**, *182* (2), 319-26.
- 747 56. Speight, L. C.; Muthusamy, A. K.; Goldberg, J. M.; Warner, J. B.; Wissner, R. F.; Willi,  
748 T. S.; Woodman, B. F.; Mehl, R. A.; Petersson, E. J., Efficient synthesis and in vivo

749 incorporation of acridon-2-ylalanine, a fluorescent amino acid for lifetime and Forster  
750 resonance energy transfer/luminescence resonance energy transfer studies. *J Am Chem Soc*  
751 **2013**, *135* (50), 18806-14.  
752
